# Supplementary material
Source: PubMed Central journal article supplement (PMC3740367)
Supplement: NIHMS486425-supplement-Supplemental_Table_1.pdf [file NIHMS486425-supplement-Supplemental_Table_1.pdf]

Supplemental Table I

| ProbeSet    | Entrez | Symbol   | Chr | Gene name                                                                                       | Gene in<br>NCBI<br>dataset | Proportion                      |                                             |                                     | q-value  | CpG<br>islands<br>(Takai &<br>Jones) | CpG<br>islands<br>(Gardiner-<br>Garden &<br>Frommer) |
|-------------|--------|----------|-----|-------------------------------------------------------------------------------------------------|----------------------------|---------------------------------|---------------------------------------------|-------------------------------------|----------|--------------------------------------|------------------------------------------------------|
|             |        |          |     |                                                                                                 |                            | Proportion<br>Present<br>Normal | Proportion<br>Present<br>Pre-<br>neoplastic | Proportion<br>Present<br>Neoplastic |          |                                      |                                                      |
| 218434_s_at | 65985  | AACS     | 12  | acetoacetyl-CoA synthetase<br>ATP-binding cassette, sub-family F (GCN20),<br>member 3           | Yes                        | 0.79                            | 0.19                                        | 0.18                                | 0.0002   | Yes                                  | Yes                                                  |
| 202394_s_at | 55324  | ABCF3    | 3   | member 3                                                                                        | Yes                        | 0.74                            | 0.40                                        | 0.28                                | 0.010675 | Yes                                  | Yes                                                  |
| 221815_at   | 11057  | ABHD2    | 15  | abhydrolase domain containing 2                                                                 | Yes                        | 0.95                            | 1.00                                        | 0.80                                | 0.040614 | Yes                                  | Yes                                                  |
| 221552_at   | 57406  | ABHD6    | 3   | abhydrolase domain containing 6                                                                 | Yes                        | 1.00                            | 0.96                                        | 0.85                                | 0.045978 | Yes                                  | Yes                                                  |
| 205730_s_at | 22885  | ABLM3    | 5   | actin binding LIM protein family, member 3                                                      | Yes                        | 1.00                            | 1.00                                        | 0.80                                | 0.00187  | Yes                                  | Yes                                                  |
| 214584_x_at | 32     | ACACB    | 12  | acetyl-Coenzyme A carboxylase beta                                                              | Yes                        | 0.32                            | 0.04                                        | 0.05                                | 0.018393 | No                                   | No                                                   |
| 221928_at   | 32     | ACACB    | 12  | acetyl-Coenzyme A carboxylase beta                                                              | Yes                        | 1.00                            | 0.89                                        | 0.53                                | 6.51E-05 | No                                   | No                                                   |
| 202366_at   | 35     | ACADS    | 12  | acyl-Coenzyme A dehydrogenase, C-2 to C-3<br>short chain                                        | Yes                        | 1.00                            | 0.95                                        | 0.80                                | 0.030418 | Yes                                  | Yes                                                  |
| 218658_s_at | 93973  | ACTR8    | 3   | ARP8 actin-related protein 8 homolog (yeast)                                                    | Yes                        | 0.84                            | 0.56                                        | 0.48                                | 0.031661 | Yes                                  | Yes                                                  |
| 220028_at   | 93     | ACVR2B   | 3   | activin A receptor, type IIB                                                                    | Yes                        | 0.95                            | 0.23                                        | 0.43                                | 0.010971 | Yes                                  | Yes                                                  |
| 221421_s_at | 81792  | ADAMTS12 | 5   | ADAM metalloproteinase with thrombospondin<br>type 1 motif, 12                                  | Yes                        | 0.58                            | 0.14                                        | 0.20                                | 0.043588 | Yes                                  | Yes                                                  |
| 214913_at   | 9508   | ADAMTS3  | 4   | ADAM metalloproteinase with thrombospondin<br>type 1 motif, 3                                   | Yes                        | 0.79                            | 0.42                                        | 0.30                                | 0.007687 | Yes                                  | Yes                                                  |
| 220287_at   | 56999  | ADAMTS9  | 3   | ADAM metalloproteinase with thrombospondin<br>type 1 motif, 9                                   | Yes                        | 1.00                            | 0.98                                        | 0.88                                | 0.038733 | Yes                                  | Yes                                                  |
| 213245_at   | 107    | ADCY1    | 7   | adenylate cyclase 1 (brain)                                                                     | Yes                        | 0.79                            | 0.18                                        | 0.23                                | 0.000841 | Yes                                  | Yes                                                  |
| 206807_s_at | 119    | ADD2     | 2   | adducin 2 (beta)                                                                                | Yes                        | 1.00                            | 0.19                                        | 0.35                                | 0.002293 | Yes                                  | Yes                                                  |
| 211492_s_at | 148    | ADRA1A   | 8   | adrenergic, alpha-1A-, receptor                                                                 | Yes                        | 0.26                            | 0.05                                        | 0.00                                | 0.006016 | Yes                                  | Yes                                                  |
| 207589_at   | 147    | ADRA1B   | 5   | adrenergic, alpha-1B-, receptor                                                                 | Yes                        | 0.53                            | 0.02                                        | 0.00                                | 2.48E-06 | Yes                                  | Yes                                                  |
| 210678_s_at | 10555  | AGPAT2   | 9   | 1-acylglycerol-3-phosphate O-acyltransferase<br>2 (lysophosphatidic acid acyltransferase, beta) | Yes                        | 0.95                            | 0.49                                        | 0.30                                | 9.75E-05 | Yes                                  | Yes                                                  |
| 212992_at   | 113146 | AHNAK2   | 14  | AHNAK nucleoprotein 2                                                                           | NA                         | 0.26                            | 0.02                                        | 0.00                                | 0.002635 | NA                                   | NA                                                   |
| 201782_s_at | 9049   | AIP      | 11  | aryl hydrocarbon receptor interacting protein                                                   | Yes                        | 1.00                            | 1.00                                        | 0.95                                | 0.047859 | Yes                                  | Yes                                                  |
| 205359_at   | 9472   | AKAP6    | 14  | A kinase (PRKA) anchor protein 6                                                                | Yes                        | 0.79                            | 0.12                                        | 0.33                                | 0.020179 | No                                   | No                                                   |
| 215029_at   | 79647  | AKIRIN1  | 1   | akirin 1                                                                                        | NA                         | 1.00                            | 0.91                                        | 0.75                                | 0.020815 | NA                                   | NA                                                   |
| 207163_s_at | 207    | AKT1     | 14  | v-akt murine thymoma viral oncogene<br>homolog 1                                                | Yes                        | 1.00                            | 0.68                                        | 0.68                                | 0.035711 | Yes                                  | Yes                                                  |
| 218373_at   | 64400  | AKTIP    | 16  | AKT interacting protein                                                                         | NA                         | 1.00                            | 1.00                                        | 0.83                                | 0.005644 | NA                                   | NA                                                   |
| 214423_x_at | 229    | ALDOB    | 9   | aldolase B, fructose-bisphosphate                                                               | Yes                        | 0.74                            | 0.84                                        | 0.33                                | 0.000734 | No                                   | No                                                   |
| 214424_s_at | 229    | ALDOB    | 9   | aldolase B, fructose-bisphosphate                                                               | Yes                        | 0.84                            | 0.84                                        | 0.63                                | 0.028634 | No                                   | No                                                   |
| 218444_at   | 79087  | ALG12    | 22  | asparagine-linked glycosylation 12 homolog<br>(S. cerevisiae, alpha-1,6-                        | Yes                        | 0.79                            | 0.14                                        | 0.08                                | 1.07E-05 | Yes                                  | Yes                                                  |
| 207133_x_at | 80216  | ALPK1    | 4   | mannosyltransferase)<br>alpha-kinase 1                                                          | Yes                        | 0.63                            | 0.33                                        | 0.20                                | 0.004917 | No                                   | No                                                   |

Supplemental Table I

| ProbeSet    | Entrez | Symbol   | Chr | Gene name                                                                        | Gene in<br>NCBI<br>dataset | Proportion<br>Present<br>Normal | Proportion<br>Present<br>Pre-<br>neoplastic | Proportion<br>Present<br>Neoplastic | q-value  | CpG<br>islands<br>(Takai &<br>Jones) | CpG<br>islands<br>(Gardiner-<br>Garden &<br>Frommer) |
|-------------|--------|----------|-----|----------------------------------------------------------------------------------|----------------------------|---------------------------------|---------------------------------------------|-------------------------------------|----------|--------------------------------------|------------------------------------------------------|
| 214425_at   | 259    | AMBP     | 9   | alpha-1-microglobulin/bikunin precursor                                          | Yes                        | 0.47                            | 0.37                                        | 0.00                                | 0.001175 | No                                   | Yes                                                  |
| 202204_s_at | 267    | AMFR     | 16  | autocrine motility factor receptor<br>adenosine monophosphate deaminase 2        | Yes                        | 0.58                            | 0.42                                        | 0.25                                | 0.026794 | Yes                                  | Yes                                                  |
| 212360_at   | 271    | AMPD2    | 1   | (isoform L)                                                                      | Yes                        | 1.00                            | 0.84                                        | 0.70                                | 0.015884 | Yes                                  | Yes                                                  |
| 221009_s_at | 51129  | ANGPTL4  | 19  | angiopoietin-like 4                                                              | Yes                        | 0.63                            | 0.93                                        | 0.35                                | 0.006424 | Yes                                  | Yes                                                  |
| 216563_at   | 23253  | ANKRD12  | 18  | ankyrin repeat domain 12                                                         | Yes                        | 0.89                            | 0.86                                        | 0.10                                | 2.72E-09 | Yes                                  | Yes                                                  |
| 213035_at   | 23243  | ANKRD28  | 3   | ankyrin repeat domain 28                                                         | Yes                        | 0.79                            | 0.74                                        | 0.35                                | 0.001211 | Yes                                  | Yes                                                  |
| 215241_at   | 63982  | ANO3     | 11  | anoctamin 3<br>acidic (leucine-rich) nuclear phosphoprotein                      | NA                         | 0.68                            | 0.33                                        | 0.28                                | 0.030864 | NA                                   | NA                                                   |
| 201043_s_at | 8125   | ANP32A   | 15  | 32 family, member A                                                              | Yes                        | 0.63                            | 0.70                                        | 0.40                                | 0.046317 | Yes                                  | Yes                                                  |
| 206894_at   | 337    | APOA4    | 11  | apolipoprotein A-IV                                                              | Yes                        | 1.00                            | 0.81                                        | 0.50                                | 0.0007   | No                                   | No                                                   |
| 39249_at    | 360    | AQP3     | 9   | aquaporin 3 (Gill blood group)                                                   | Yes                        | 0.68                            | 0.51                                        | 0.13                                | 0.000467 | Yes                                  | Yes                                                  |
| 211110_s_at | 367    | AR       | X   | androgen receptor<br>ADP-ribosylation factor GTPase activating                   | Yes                        | 0.89                            | 0.72                                        | 0.55                                | 0.026082 | Yes                                  | Yes                                                  |
| 211975_at   | 84364  | ARFGAP2  | 11  | protein 2                                                                        | NA                         | 1.00                            | 1.00                                        | 0.93                                | 0.03841  | NA                                   | NA                                                   |
| 201228_s_at | 10425  | ARIH2    | 3   | ariadne homolog 2 (Drosophila)<br>ADP-ribosylation-like factor 6 interacting     | NA                         | 0.21                            | 0.09                                        | 0.03                                | 0.035217 | NA                                   | NA                                                   |
| 218216_x_at | 51329  | ARL6IP4  | 12  | protein 4                                                                        | Yes                        | 1.00                            | 0.91                                        | 0.75                                | 0.013262 | Yes                                  | Yes                                                  |
| 221758_at   | 93436  | ARMC6    | 19  | armadillo repeat containing 6<br>aryl hydrocarbon receptor nuclear translocator- | Yes                        | 0.68                            | 0.47                                        | 0.30                                | 0.024432 | Yes                                  | Yes                                                  |
| 209824_s_at | 406    | ARNTL    | 11  | like<br>aryl hydrocarbon receptor nuclear translocator-                          | Yes                        | 0.63                            | 0.21                                        | 0.15                                | 0.004445 | Yes                                  | Yes                                                  |
| 210971_s_at | 406    | ARNTL    | 11  | like                                                                             | Yes                        | 0.95                            | 0.39                                        | 0.43                                | 0.00828  | Yes                                  | Yes                                                  |
| 218857_s_at | 80150  | ASRGL1   | 11  | asparaginase like 1                                                              | Yes                        | 0.42                            | 0.12                                        | 0.08                                | 0.008907 | Yes                                  | Yes                                                  |
| 204999_s_at | 22809  | ATF5     | 19  | activating transcription factor 5<br>ATG16 autophagy related 16-like 1 (S.       | NA                         | 1.00                            | 0.84                                        | 0.58                                | 0.001453 | NA                                   | NA                                                   |
| 220521_s_at | 55054  | ATG16L1  | 2   | cerevisiae)<br>ATPase, H+ transporting, lysosomal 9kDa, V0                       | Yes                        | 0.53                            | 0.49                                        | 0.15                                | 0.005219 | Yes                                  | Yes                                                  |
| 201171_at   | 8992   | ATP6V0E1 | 5   | subunit e1                                                                       | NA                         | 0.68                            | 0.60                                        | 0.28                                | 0.006589 | NA                                   | NA                                                   |
| 214934_at   | 374868 | ATP9B    | 18  | ATPase, class II, type 9B                                                        | Yes                        | 1.00                            | 0.95                                        | 0.80                                | 0.018681 | Yes                                  | Yes                                                  |
| 209902_at   | 545    | ATR      | 3   | ataxia telangiectasia and Rad3 related                                           | Yes                        | 0.53                            | 0.14                                        | 0.18                                | 0.022083 | Yes                                  | Yes                                                  |
| 213744_at   | 26033  | ATRNL1   | 10  | attractin-like 1                                                                 | Yes                        | 0.47                            | 0.11                                        | 0.13                                | 0.015494 | Yes                                  | Yes                                                  |
| 206251_s_at | 552    | AVPR1A   | 12  | arginine vasopressin receptor 1A<br>UDP-GlcNAc:betaGal beta-1,3-N-               | Yes                        | 0.89                            | 0.18                                        | 0.40                                | 0.021841 | No                                   | Yes                                                  |
| 215055_at   | 146712 | B3GNTL1  | 17  | acetylglucosaminyltransferase-like 1                                             | Yes                        | 0.26                            | 0.05                                        | 0.05                                | 0.032847 | Yes                                  | Yes                                                  |
| 210534_s_at | 27077  | B9D1     | 17  | B9 protein domain 1                                                              | NA                         | 1.00                            | 0.77                                        | 0.73                                | 0.049937 | NA                                   | NA                                                   |
| 219966_x_at | 54971  | BANP     | 16  | BTG3 associated nuclear protein                                                  | Yes                        | 0.42                            | 0.49                                        | 0.13                                | 0.018759 | Yes                                  | Yes                                                  |
| 212081_x_at | 7916   | BAT2     | 6   | HLA-B associated transcript 2                                                    | Yes                        | 1.00                            | 0.67                                        | 0.70                                | 0.033743 | Yes                                  | Yes                                                  |
| 211944_at   | 23215  | BAT2D1   | 1   | BAT2 domain containing 1                                                         | Yes                        | 0.79                            | 0.91                                        | 0.60                                | 0.044128 | Yes                                  | Yes                                                  |
| 37549_g_at  | 27241  | BBS9     | 7   | Bardet-Biedl syndrome 9                                                          | NA                         | 0.95                            | 0.74                                        | 0.63                                | 0.031925 | NA                                   | NA                                                   |

Supplemental Table I

| ProbeSet    | Entrez | Symbol    | Chr | Gene name                                                                         | Gene in<br>NCBI<br>dataset | Proportion                      |                                             |                                     | q-value  | CpG<br>islands<br>(Takai &<br>Jones) | CpG<br>islands<br>(Gardiner-<br>Garden &<br>Frommer) |
|-------------|--------|-----------|-----|-----------------------------------------------------------------------------------|----------------------------|---------------------------------|---------------------------------------------|-------------------------------------|----------|--------------------------------------|------------------------------------------------------|
|             |        |           |     |                                                                                   |                            | Proportion<br>Present<br>Normal | Proportion<br>Present<br>Pre-<br>neoplastic | Proportion<br>Present<br>Neoplastic |          |                                      |                                                      |
| 208292_at   | 27302  | BMP10     | 2   | bone morphogenetic protein 10<br>BCL2/adenovirus E1B 19kDa interacting            | Yes                        | 0.37                            | 0.05                                        | 0.05                                | 0.011819 | No                                   | No                                                   |
| 37226_at    | 662    | BNIP1     | 5   | protein 1                                                                         | Yes                        | 1.00                            | 0.63                                        | 0.65                                | 0.038679 | Yes                                  | Yes                                                  |
| 207186_s_at | 2186   | BPTF      | 17  | bromodomain PHD finger transcription factor                                       | NA                         | 1.00                            | 1.00                                        | 0.90                                | 0.034017 | NA                                   | NA                                                   |
| 202103_at   | 23476  | BRD4      | 19  | bromodomain containing 4                                                          | Yes                        | 0.84                            | 0.54                                        | 0.45                                | 0.017834 | No                                   | Yes                                                  |
| 205715_at   | 683    | BST1      | 4   | bone marrow stromal cell antigen 1                                                | Yes                        | 0.21                            | 0.09                                        | 0.00                                | 0.022908 | Yes                                  | Yes                                                  |
| 203571_s_at | 10974  | C10orf116 | 10  | chromosome 10 open reading frame 116                                              | Yes                        | 0.74                            | 0.96                                        | 0.48                                | 0.004123 | Yes                                  | Yes                                                  |
| 218925_s_at | 64776  | C11orf1   | 11  | chromosome 11 open reading frame 1                                                | Yes                        | 0.32                            | 0.11                                        | 0.05                                | 0.041112 | Yes                                  | Yes                                                  |
| 204289_at   | 80127  | C14orf45  | 14  | chromosome 14 open reading frame 45                                               | Yes                        | 0.53                            | 0.18                                        | 0.03                                | 0.000133 | No                                   | No                                                   |
| 219018_s_at | 317762 | C14orf65  | 14  | chromosome 14 open reading frame 65                                               | NA                         | 0.89                            | 0.28                                        | 0.20                                | 0.000376 | NA                                   | NA                                                   |
| 213105_s_at | 115939 | C16orf42  | 16  | chromosome 16 open reading frame 42                                               | NA                         | 0.63                            | 0.09                                        | 0.23                                | 0.045478 | NA                                   | NA                                                   |
| 203830_at   | 64149  | C17orf75  | 17  | chromosome 17 open reading frame 75                                               | NA                         | 0.68                            | 0.21                                        | 0.25                                | 0.038733 | NA                                   | NA                                                   |
| 219419_at   | 79863  | C18orf22  | 18  | chromosome 18 open reading frame 22                                               | Yes                        | 0.74                            | 0.23                                        | 0.18                                | 0.001374 | Yes                                  | Yes                                                  |
| 218159_at   | 65992  | C20orf116 | 20  | chromosome 20 open reading frame 116                                              | Yes                        | 0.89                            | 0.72                                        | 0.50                                | 0.012529 | Yes                                  | Yes                                                  |
| 218586_at   | 55257  | C20orf20  | 20  | chromosome 20 open reading frame 20                                               | Yes                        | 0.84                            | 0.68                                        | 0.43                                | 0.019358 | Yes                                  | Yes                                                  |
| 219706_at   | 55317  | C20orf29  | 20  | chromosome 20 open reading frame 29                                               | Yes                        | 0.95                            | 0.68                                        | 0.55                                | 0.021113 | Yes                                  | Yes                                                  |
| 218089_at   | 25980  | C20orf4   | 20  | chromosome 20 open reading frame 4                                                | Yes                        | 0.89                            | 0.79                                        | 0.63                                | 0.043115 | Yes                                  | Yes                                                  |
| 210667_s_at | 8209   | C21orf33  | 21  | chromosome 21 open reading frame 33                                               | Yes                        | 1.00                            | 0.98                                        | 0.83                                | 0.021113 | Yes                                  | Yes                                                  |
| 212421_at   | 23313  | C22orf9   | 22  | chromosome 22 open reading frame 9                                                | Yes                        | 1.00                            | 0.96                                        | 0.88                                | 0.045297 | Yes                                  | Yes                                                  |
| 219747_at   | 79625  | C4orf31   | 4   | chromosome 4 open reading frame 31                                                | Yes                        | 0.53                            | 0.12                                        | 0.18                                | 0.049613 | Yes                                  | Yes                                                  |
| 215100_at   | 84830  | C6orf105  | 6   | chromosome 6 open reading frame 105                                               | Yes                        | 0.74                            | 0.44                                        | 0.30                                | 0.022456 | No                                   | No                                                   |
| 215024_at   | 221960 | C7orf28B  | 7   | chromosome 7 open reading frame 28B                                               | Yes                        | 0.58                            | 0.30                                        | 0.23                                | 0.024644 | Yes                                  | Yes                                                  |
| 210109_at   | 27099  | C7orf54   | 7   | chromosome 7 open reading frame 54                                                | NA                         | 0.58                            | 0.44                                        | 0.20                                | 0.010721 | NA                                   | NA                                                   |
| 217130_at   | 90477  | C9orf33   | 9   | chromosome 9 open reading frame 33                                                | NA                         | 0.42                            | 0.05                                        | 0.10                                | 0.024721 | NA                                   | NA                                                   |
| 210727_at   | 796    | CALCA     | 11  | calcitonin-related polypeptide alpha                                              | Yes                        | 0.53                            | 0.00                                        | 0.03                                | 2.71E-05 | Yes                                  | Yes                                                  |
| 210728_s_at | 796    | CALCA     | 11  | calcitonin-related polypeptide alpha                                              | Yes                        | 0.26                            | 0.00                                        | 0.03                                | 0.018865 | Yes                                  | Yes                                                  |
| 217561_at   | 796    | CALCA     | 11  | calcitonin-related polypeptide alpha                                              | Yes                        | 0.63                            | 0.46                                        | 0.25                                | 0.020623 | Yes                                  | Yes                                                  |
| 210020_x_at | 810    | CALML3    | 10  | calmodulin-like 3<br>calcium/calmodulin-dependent protein kinase                  | Yes                        | 0.89                            | 0.26                                        | 0.30                                | 0.003468 | Yes                                  | Yes                                                  |
| 34846_at    | 816    | CAMK2B    | 7   | (CaM kinase) II beta<br>calmodulin regulated spectrin-associated                  | Yes                        | 0.58                            | 0.14                                        | 0.15                                | 0.008809 | Yes                                  | Yes                                                  |
| 212710_at   | 157922 | CAMSAP1   | 9   | protein 1                                                                         | Yes                        | 0.79                            | 0.49                                        | 0.38                                | 0.023754 | No                                   | Yes                                                  |
| 212948_at   | 23125  | CAMTA2    | 17  | calmodulin binding transcription activator 2                                      | Yes                        | 1.00                            | 0.61                                        | 0.63                                | 0.030288 | Yes                                  | Yes                                                  |
| 214888_at   | 824    | CAPN2     | 1   | calpain 2, (m/II) large subunit                                                   | Yes                        | 0.68                            | 0.42                                        | 0.23                                | 0.012801 | Yes                                  | Yes                                                  |
| 220293_at   | 79820  | CATSPERB  | 14  | cation channel, sperm-associated, beta<br>core-binding factor, runt domain, alpha | NA                         | 0.26                            | 0.14                                        | 0.05                                | 0.039251 | NA                                   | NA                                                   |
| 208056_s_at | 863    | CBFA2T3   | 16  | subunit 2; translocated to, 3<br>chromobox homolog 5 (HP1 alpha homolog,          | Yes                        | 0.47                            | 0.05                                        | 0.03                                | 8.46E-05 | No                                   | Yes                                                  |
| 209715_at   | 23468  | CBX5      | 12  | Drosophila)                                                                       | Yes                        | 0.58                            | 0.11                                        | 0.10                                | 0.002156 | Yes                                  | Yes                                                  |

Supplemental Table I

| ProbeSet    | Entrez | Symbol | Chr | Gene name                                                                        | Gene in<br>NCBI<br>dataset | Proportion                      |                                             |                                     | q-value  | CpG<br>islands<br>(Takai &<br>Jones) | CpG<br>islands<br>(Gardiner-<br>Garden &<br>Frommer) |
|-------------|--------|--------|-----|----------------------------------------------------------------------------------|----------------------------|---------------------------------|---------------------------------------------|-------------------------------------|----------|--------------------------------------|------------------------------------------------------|
|             |        |        |     |                                                                                  |                            | Proportion<br>Present<br>Normal | Proportion<br>Present<br>Pre-<br>neoplastic | Proportion<br>Present<br>Neoplastic |          |                                      |                                                      |
| 218125_s_at | 55246  | CCDC25 | 8   | coiled-coil domain containing 25                                                 | Yes                        | 1.00                            | 0.82                                        | 0.75                                | 0.028854 | Yes                                  | Yes                                                  |
| 218722_s_at | 79714  | CCDC51 | 3   | coiled-coil domain containing 51                                                 | Yes                        | 1.00                            | 0.56                                        | 0.55                                | 0.013226 | Yes                                  | Yes                                                  |
| 212886_at   | 26112  | CCDC69 | 5   | coiled-coil domain containing 69                                                 | Yes                        | 1.00                            | 0.65                                        | 0.35                                | 3.77E-05 | Yes                                  | Yes                                                  |
| 210549_s_at | 6368   | CCL23  | 17  | chemokine (C-C motif) ligand 23                                                  | Yes                        | 0.37                            | 0.04                                        | 0.00                                | 0.000334 | No                                   | No                                                   |
| 205789_at   | 912    | CD1D   | 1   | CD1d molecule                                                                    | Yes                        | 0.89                            | 0.91                                        | 0.75                                | 0.048948 | No                                   | No                                                   |
| 205692_s_at | 952    | CD38   | 4   | CD38 molecule                                                                    | Yes                        | 0.68                            | 0.47                                        | 0.25                                | 0.008593 | Yes                                  | Yes                                                  |
| 206508_at   | 970    | CD70   | 19  | CD70 molecule                                                                    | NA                         | 0.42                            | 0.04                                        | 0.03                                | 0.001703 | NA                                   | NA                                                   |
| 205627_at   | 978    | CDA    | 1   | cytidine deaminase                                                               | Yes                        | 0.68                            | 0.49                                        | 0.13                                | 0.000114 | No                                   | No                                                   |
| 206898_at   | 28513  | CDH19  | 18  | cadherin 19, type 2                                                              | Yes                        | 1.00                            | 1.00                                        | 0.85                                | 0.016151 | No                                   | No                                                   |
| 204029_at   | 1952   | CELSR2 | 1   | cadherin, EGF LAG seven-pass G-type<br>receptor 2 (flamingo homolog, Drosophila) | Yes                        | 0.53                            | 0.23                                        | 0.20                                | 0.035398 | Yes                                  | Yes                                                  |
| 214102_at   | 116984 | CENTD1 | 4   | centaurin, delta 1                                                               | Yes                        | 0.89                            | 0.89                                        | 0.65                                | 0.027432 | Yes                                  | Yes                                                  |
| 213956_at   | 9857   | CEP350 | 1   | centrosomal protein 350kDa                                                       | NA                         | 1.00                            | 0.98                                        | 0.83                                | 0.011807 | NA                                   | NA                                                   |
| 209508_x_at | 8837   | CFLAR  | 2   | CASP8 and FADD-like apoptosis regulator                                          | Yes                        | 1.00                            | 1.00                                        | 0.85                                | 0.010367 | Yes                                  | Yes                                                  |
| 214486_x_at | 8837   | CFLAR  | 2   | CASP8 and FADD-like apoptosis regulator                                          | Yes                        | 0.26                            | 0.30                                        | 0.00                                | 0.025316 | Yes                                  | Yes                                                  |
| 212313_at   | 91782  | CHMP7  | 8   | CHMP family, member 7                                                            | Yes                        | 1.00                            | 0.96                                        | 0.85                                | 0.031892 | No                                   | No                                                   |
| 202175_at   | 79586  | CHPF   | 2   | chondroitin polymerizing factor                                                  | Yes                        | 0.79                            | 0.51                                        | 0.38                                | 0.019615 | Yes                                  | Yes                                                  |
| 211248_s_at | 8646   | CHRD   | 3   | chordin                                                                          | Yes                        | 0.68                            | 0.86                                        | 0.43                                | 0.008012 | Yes                                  | Yes                                                  |
| 220446_s_at | 10164  | CHST4  | 16  | carbohydrate (N-acetylglucosamine 6-O)<br>sulfotransferase 4                     | Yes                        | 1.00                            | 1.00                                        | 0.85                                | 0.016151 | No                                   | No                                                   |
| 205328_at   | 9071   | CLDN10 | 13  | claudin 10                                                                       | Yes                        | 0.95                            | 1.00                                        | 0.73                                | 0.003353 | No                                   | Yes                                                  |
| 220496_at   | 51266  | CLEC1B | 12  | C-type lectin domain family 1, member B                                          | Yes                        | 0.95                            | 0.54                                        | 0.45                                | 0.008801 | No                                   | No                                                   |
| 207995_s_at | 10332  | CLEC4M | 19  | C-type lectin domain family 4, member M                                          | Yes                        | 0.89                            | 0.63                                        | 0.53                                | 0.013122 | No                                   | No                                                   |
| 221845_s_at | 81570  | CLPB   | 11  | ClpB caseinolytic peptidase B homolog (E.<br>coli)                               | Yes                        | 0.58                            | 0.26                                        | 0.18                                | 0.011682 | Yes                                  | Yes                                                  |
| 220304_s_at | 54714  | CNGB3  | 8   | cyclic nucleotide gated channel beta 3                                           | Yes                        | 0.53                            | 0.18                                        | 0.08                                | 0.002037 | No                                   | No                                                   |
| 209874_x_at | 54805  | CNNM2  | 10  | cyclin M2                                                                        | Yes                        | 0.84                            | 0.19                                        | 0.23                                | 0.001673 | Yes                                  | Yes                                                  |
| 206586_at   | 1269   | CNR2   | 1   | cannabinoid receptor 2 (macrophage)                                              | Yes                        | 0.47                            | 0.25                                        | 0.13                                | 0.009155 | No                                   | No                                                   |
| 201913_s_at | 80347  | COASY  | 17  | Coenzyme A synthase                                                              | Yes                        | 0.89                            | 0.65                                        | 0.35                                | 0.00032  | Yes                                  | Yes                                                  |
| 214337_at   | 1314   | COPA   | 1   | coatomer protein complex, subunit alpha                                          | Yes                        | 0.68                            | 0.39                                        | 0.25                                | 0.009846 | No                                   | No                                                   |
| 201264_at   | 11316  | COPE   | 19  | coatomer protein complex, subunit epsilon                                        | Yes                        | 0.79                            | 0.44                                        | 0.28                                | 0.001757 | Yes                                  | Yes                                                  |
| 209029_at   | 50813  | COPS7A | 12  | COP9 constitutive photomorphogenic<br>homolog subunit 7A (Arabidopsis)           | Yes                        | 1.00                            | 0.98                                        | 0.85                                | 0.031927 | Yes                                  | Yes                                                  |
| 221227_x_at | 51805  | COQ3   | 6   | coenzyme Q3 homolog, methyltransferase (S.<br>cerevisiae)                        | Yes                        | 0.84                            | 0.25                                        | 0.38                                | 0.027616 | Yes                                  | Yes                                                  |
| 209746_s_at | 10229  | COQ7   | 16  | coenzyme Q7 homolog, ubiquinone (yeast)                                          | Yes                        | 0.84                            | 0.33                                        | 0.33                                | 0.028283 | Yes                                  | Yes                                                  |
| 213454_at   | 1325   | CORT   | 1   | cortistatin                                                                      | NA                         | 0.74                            | 0.23                                        | 0.28                                | 0.023128 | NA                                   | NA                                                   |
| 201638_s_at | 29894  | CPSF1  | 8   | cleavage and polyadenylation specific factor<br>1, 160kDa                        | NA                         | 0.16                            | 0.04                                        | 0.00                                | 0.041473 | NA                                   | NA                                                   |
| 204263_s_at | 1376   | CPT2   | 1   | carnitine palmitoyltransferase II                                                | Yes                        | 1.00                            | 1.00                                        | 0.83                                | 0.01401  | Yes                                  | Yes                                                  |

Supplemental Table I

| ProbeSet    | Entrez | Symbol  | Chr | Gene name                                    | Gene in<br>NCBI<br>dataset | Proportion<br>Present<br>Normal | Proportion<br>Present<br>Pre-<br>neoplastic | Proportion<br>Present<br>Neoplastic | q-value  | CpG<br>islands<br>(Takai &<br>Jones) | CpG<br>islands<br>(Gardiner-<br>Garden &<br>Frommer) |
|-------------|--------|---------|-----|----------------------------------------------|----------------------------|---------------------------------|---------------------------------------------|-------------------------------------|----------|--------------------------------------|------------------------------------------------------|
|             |        |         |     | corticotropin releasing hormone binding      |                            |                                 |                                             |                                     |          |                                      |                                                      |
| 205984_at   | 1393   | CRHBP   | 5   | protein                                      | Yes                        | 1.00                            | 0.84                                        | 0.73                                | 0.028462 | Yes                                  | No                                                   |
| 216314_at   | 167    | CRISP1  | 6   | cysteine-rich secretory protein 1            | Yes                        | 0.16                            | 0.00                                        | 0.00                                | 0.015642 | No                                   | No                                                   |
|             |        |         |     | v-crK sarcoma virus CT10 oncogene homolog    |                            |                                 |                                             |                                     |          |                                      |                                                      |
| 202226_s_at | 1398   | CRK     | 17  | (avian)                                      | Yes                        | 0.32                            | 0.28                                        | 0.08                                | 0.047487 | Yes                                  | Yes                                                  |
| 216801_at   | 9696   | CROCC   | 1   | ciliary rootlet coiled-coil, rootletin       | Yes                        | 0.58                            | 0.14                                        | 0.18                                | 0.021336 | No                                   | No                                                   |
| 201161_s_at | 8531   | CSDA    | 12  | cold shock domain protein A                  | Yes                        | 0.53                            | 0.54                                        | 0.18                                | 0.015698 | Yes                                  | Yes                                                  |
| 212073_at   | 1457   | CSNK2A1 | 20  | casein kinase 2, alpha 1 polypeptide         | Yes                        | 0.79                            | 0.60                                        | 0.28                                | 0.002064 | Yes                                  | Yes                                                  |
| 213979_s_at | 1487   | CTBP1   | 4   | C-terminal binding protein 1                 | Yes                        | 0.89                            | 0.84                                        | 0.58                                | 0.005227 | Yes                                  | Yes                                                  |
| 201218_at   | 1488   | CTBP2   | 10  | C-terminal binding protein 2                 | Yes                        | 1.00                            | 1.00                                        | 0.90                                | 0.034017 | Yes                                  | Yes                                                  |
| 214377_s_at | 1506   | CTRL    | 16  | chymotrypsin-like                            | NA                         | 0.74                            | 0.32                                        | 0.20                                | 0.003126 | NA                                   | NA                                                   |
| 210042_s_at | 1522   | CTSZ    | 20  | cathepsin Z                                  | Yes                        | 1.00                            | 0.53                                        | 0.58                                | 0.028595 | Yes                                  | Yes                                                  |
| 218002_s_at | 9547   | CXCL14  | 5   | chemokine (C-X-C motif) ligand 14            | Yes                        | 0.42                            | 0.70                                        | 0.23                                | 0.047108 | Yes                                  | Yes                                                  |
| 212977_at   | 57007  | CXCR7   | 2   | chemokine (C-X-C motif) receptor 7           | NA                         | 0.74                            | 0.95                                        | 0.53                                | 0.023796 | NA                                   | NA                                                   |
| 217206_at   | 360155 | CYCSP52 | 1   | cytochrome c, somatic pseudogene 52          | Yes                        | 0.26                            | 0.11                                        | 0.03                                | 0.020309 | No                                   | No                                                   |
|             |        |         |     | cylicin, basic protein of sperm head         |                            |                                 |                                             |                                     |          |                                      |                                                      |
| 207780_at   | 1539   | CYLC2   | 9   | cytoskeleton 2                               | Yes                        | 0.32                            | 0.07                                        | 0.05                                | 0.006301 | No                                   | No                                                   |
| 205471_s_at | 1602   | DACH1   | 13  | dachshund homolog 1 (Drosophila)             | Yes                        | 0.89                            | 0.82                                        | 0.38                                | 0.00018  | Yes                                  | Yes                                                  |
|             |        |         |     | discoidin, CUB and LCCL domain containing    |                            |                                 |                                             |                                     |          |                                      |                                                      |
| 213873_at   | 131566 | DCBLD2  | 3   | 2                                            | Yes                        | 0.47                            | 0.09                                        | 0.08                                | 0.002242 | Yes                                  | Yes                                                  |
| 222101_s_at | 8642   | DCHS1   | 11  | dachsous 1 (Drosophila)                      | Yes                        | 0.89                            | 0.88                                        | 0.65                                | 0.016292 | Yes                                  | Yes                                                  |
|             |        |         |     |                                              |                            |                                 |                                             |                                     |          |                                      |                                                      |
| 208151_x_at | 10521  | DDX17   | 22  | DEAD (Asp-Glu-Ala-Asp) box polypeptide 17    | NA                         | 0.84                            | 0.91                                        | 0.58                                | 0.008295 | NA                                   | NA                                                   |
| 215058_at   | 160518 | DENND5B | 12  | DENN/MADD domain containing 5B               | NA                         | 1.00                            | 0.74                                        | 0.53                                | 0.002283 | NA                                   | NA                                                   |
| 219641_at   | 55070  | DET1    | 15  | de-etiolated homolog 1 (Arabidopsis)         | Yes                        | 0.79                            | 0.84                                        | 0.50                                | 0.023382 | No                                   | No                                                   |
|             |        |         |     | DNA fragmentation factor, 45kDa, alpha       |                            |                                 |                                             |                                     |          |                                      |                                                      |
| 203277_at   | 1676   | DFFA    | 1   | polypeptide                                  | Yes                        | 0.79                            | 0.70                                        | 0.48                                | 0.01215  | Yes                                  | Yes                                                  |
| 203816_at   | 1716   | DGUOK   | 2   | deoxyguanosine kinase                        | Yes                        | 0.47                            | 0.65                                        | 0.15                                | 0.005048 | Yes                                  | Yes                                                  |
| 218547_at   | 79947  | DHDDS   | 1   | dehydrodolichyl diphosphate synthase         | Yes                        | 0.89                            | 0.70                                        | 0.50                                | 0.006562 | Yes                                  | Yes                                                  |
| 213631_x_at | 1723   | DHODH   | 16  | dihydroorotate dehydrogenase                 | Yes                        | 1.00                            | 0.65                                        | 0.60                                | 0.023754 | Yes                                  | Yes                                                  |
|             |        |         |     |                                              |                            |                                 |                                             |                                     |          |                                      |                                                      |
| 212649_at   | 54505  | DHX29   | 5   | DEAH (Asp-Glu-Ala-His) box polypeptide 29    | Yes                        | 0.95                            | 0.98                                        | 0.48                                | 5.66E-06 | Yes                                  | Yes                                                  |
| 215506_s_at | 9077   | DIRAS3  | 1   | DIRAS family, GTP-binding RAS-like 3         | Yes                        | 1.00                            | 0.89                                        | 0.75                                | 0.030418 | Yes                                  | Yes                                                  |
| 220512_at   | 10395  | DLC1    | 8   | deleted in liver cancer 1                    | Yes                        | 0.95                            | 0.70                                        | 0.60                                | 0.037896 | No                                   | No                                                   |
|             |        |         |     | discs, large (Drosophila) homolog-associated |                            |                                 |                                             |                                     |          |                                      |                                                      |
| 202570_s_at | 22839  | DLGAP4  | 20  | protein 4                                    | Yes                        | 0.26                            | 0.53                                        | 0.08                                | 0.031927 | No                                   | No                                                   |
|             |        |         |     | discs, large (Drosophila) homolog-associated |                            |                                 |                                             |                                     |          |                                      |                                                      |
| 202572_s_at | 22839  | DLGAP4  | 20  | protein 4                                    | Yes                        | 0.95                            | 0.72                                        | 0.60                                | 0.015244 | No                                   | No                                                   |
|             |        |         |     | DnaJ (Hsp40) homolog, subfamily B, member    |                            |                                 |                                             |                                     |          |                                      |                                                      |
| 202867_s_at | 54788  | DNAJB12 | 10  | 12                                           | Yes                        | 0.95                            | 0.91                                        | 0.68                                | 0.006624 | Yes                                  | Yes                                                  |

Supplemental Table I

| ProbeSet    | Entrez | Symbol  | Chr | Gene name                                                                                      | Gene in<br>NCBI<br>dataset | Proportion<br>Present<br>Normal | Proportion<br>Present<br>Pre-<br>neoplastic | Proportion<br>Present<br>Neoplastic | q-value  | CpG<br>islands<br>(Takai &<br>Jones) | CpG<br>islands<br>(Gardiner-<br>Garden &<br>Frommer) |
|-------------|--------|---------|-----|------------------------------------------------------------------------------------------------|----------------------------|---------------------------------|---------------------------------------------|-------------------------------------|----------|--------------------------------------|------------------------------------------------------|
| 212817_at   | 25822  | DNAJB5  | 9   | DnaJ (Hsp40) homolog, subfamily B, member 5                                                    | NA                         | 0.68                            | 0.44                                        | 0.23                                | 0.00832  | NA                                   | NA                                                   |
| 215792_s_at | 55735  | DNAJC11 | 1   | DnaJ (Hsp40) homolog, subfamily C, member 11                                                   | NA                         | 0.89                            | 0.77                                        | 0.40                                | 8.46E-05 | NA                                   | NA                                                   |
| 208499_s_at | 5611   | DNAJC3  | 13  | DnaJ (Hsp40) homolog, subfamily C, member 3                                                    | Yes                        | 0.95                            | 0.32                                        | 0.40                                | 0.00999  | Yes                                  | Yes                                                  |
| 215135_at   | 23549  | DNPEP   | 2   | aspartyl aminopeptidase                                                                        | Yes                        | 0.26                            | 0.32                                        | 0.00                                | 0.023962 | Yes                                  | Yes                                                  |
| 203187_at   | 1793   | DOCK1   | 10  | dedicator of cytokinesis 1                                                                     | Yes                        | 0.74                            | 0.70                                        | 0.40                                | 0.048207 | No                                   | No                                                   |
| 202632_at   | 1801   | DPH1    | 17  | DPH1 homolog (S. cerevisiae)                                                                   | NA                         | 1.00                            | 0.96                                        | 0.83                                | 0.02815  | NA                                   | NA                                                   |
| 209391_at   | 8818   | DPM2    | 9   | dolichyl-phosphate mannosyltransferase polypeptide 2, regulatory subunit                       | Yes                        | 1.00                            | 0.84                                        | 0.70                                | 0.011522 | Yes                                  | Yes                                                  |
| 2028_s_at   | 1869   | E2F1    | 20  | E2F transcription factor 1                                                                     | Yes                        | 0.26                            | 0.07                                        | 0.00                                | 0.004094 | Yes                                  | Yes                                                  |
| 201749_at   | 1889   | ECE1    | 1   | endothelin converting enzyme 1                                                                 | Yes                        | 0.95                            | 0.86                                        | 0.63                                | 0.016796 | Yes                                  | Yes                                                  |
| 209365_s_at | 1893   | ECM1    | 1   | extracellular matrix protein 1                                                                 | Yes                        | 1.00                            | 1.00                                        | 0.55                                | 2.93E-06 | No                                   | Yes                                                  |
| 204840_s_at | 8411   | EEA1    | 12  | early endosome antigen 1                                                                       | Yes                        | 0.89                            | 0.77                                        | 0.40                                | 0.000381 | Yes                                  | Yes                                                  |
| 220591_s_at | 80258  | EFHC2   | X   | EF-hand domain (C-terminal) containing 2                                                       | Yes                        | 0.79                            | 0.44                                        | 0.38                                | 0.014407 | Yes                                  | Yes                                                  |
| 209343_at   | 80303  | EFHD1   | 2   | EF-hand domain family, member D1                                                               | Yes                        | 0.84                            | 0.81                                        | 0.40                                | 0.001146 | Yes                                  | Yes                                                  |
| 202669_s_at | 1948   | EFNB2   | 13  | ephrin-B2                                                                                      | Yes                        | 0.79                            | 0.60                                        | 0.38                                | 0.003477 | Yes                                  | Yes                                                  |
| 212650_at   | 23301  | EHBP1   | 2   | EH domain binding protein 1                                                                    | Yes                        | 0.89                            | 0.77                                        | 0.58                                | 0.016599 | Yes                                  | Yes                                                  |
| 211501_s_at | 8662   | EIF3B   | 7   | eukaryotic translation initiation factor 3, subunit B                                          | NA                         | 0.95                            | 0.51                                        | 0.45                                | 0.005914 | NA                                   | NA                                                   |
| 215190_at   | 10480  | EIF3M   | 11  | eukaryotic translation initiation factor 3, subunit M                                          | NA                         | 0.89                            | 0.65                                        | 0.58                                | 0.047108 | NA                                   | NA                                                   |
| 201026_at   | 9669   | EIF5B   | 2   | eukaryotic translation initiation factor 5B                                                    | Yes                        | 1.00                            | 0.82                                        | 0.45                                | 2.75E-05 | Yes                                  | Yes                                                  |
| 210827_s_at | 1999   | ELF3    | 1   | E74-like factor 3 (ets domain transcription factor, epithelial-specific )                      | Yes                        | 1.00                            | 0.89                                        | 0.78                                | 0.03566  | No                                   | No                                                   |
| 203617_x_at | 2002   | ELK1    | X   | ELK1, member of ETS oncogene family                                                            | Yes                        | 0.58                            | 0.25                                        | 0.10                                | 0.002255 | Yes                                  | Yes                                                  |
| 206919_at   | 2005   | ELK4    | 1   | ELK4, ETS-domain protein (SRF accessory protein 1)                                             | Yes                        | 0.63                            | 0.14                                        | 0.23                                | 0.013294 | Yes                                  | Yes                                                  |
| 214153_at   | 60481  | ELOVL5  | 6   | ELOVL family member 5, elongation of long chain fatty acids (FEN1/Elo2, SUR4/Elo3-like, yeast) | Yes                        | 0.95                            | 0.75                                        | 0.35                                | 1.91E-05 | Yes                                  | Yes                                                  |
| 204398_s_at | 24139  | EML2    | 19  | echinoderm microtubule associated protein like 2                                               | Yes                        | 0.32                            | 0.33                                        | 0.08                                | 0.028283 | Yes                                  | Yes                                                  |
| 204975_at   | 2013   | EMP2    | 16  | epithelial membrane protein 2                                                                  | Yes                        | 0.53                            | 0.30                                        | 0.18                                | 0.02008  | Yes                                  | Yes                                                  |
| 201340_s_at | 8507   | ENC1    | 5   | ectodermal-neural cortex (with BTB-like domain)                                                | Yes                        | 0.32                            | 0.09                                        | 0.05                                | 0.027432 | Yes                                  | Yes                                                  |
| 204077_x_at | 9583   | ENTPD4  | 8   | ectonucleoside triphosphate diphosphohydrolase 4                                               | Yes                        | 0.21                            | 0.04                                        | 0.03                                | 0.037754 | No                                   | Yes                                                  |

Supplemental Table I

| ProbeSet    | Entrez | Symbol   | Chr | Gene name                                                                      | Gene in<br>NCBI<br>dataset | Proportion<br>Present<br>Normal | Proportion<br>Present<br>Pre-<br>neoplastic | Proportion<br>Present<br>Neoplastic | q-value  | CpG<br>islands<br>(Takai &<br>Jones) | CpG<br>islands<br>(Gardiner-<br>Garden &<br>Frommer) |
|-------------|--------|----------|-----|--------------------------------------------------------------------------------|----------------------------|---------------------------------|---------------------------------------------|-------------------------------------|----------|--------------------------------------|------------------------------------------------------|
| 220153_at   | 57089  | ENTPD7   | 10  | ectonucleoside triphosphate<br>diphosphohydrolase 7                            | Yes                        | 0.16                            | 0.02                                        | 0.00                                | 0.016713 | Yes                                  | Yes                                                  |
| 204505_s_at | 2039   | EPB49    | 8   | erythrocyte membrane protein band 4.9<br>(dematin)                             | Yes                        | 0.89                            | 0.82                                        | 0.50                                | 0.003247 | No                                   | Yes                                                  |
| 202894_at   | 2050   | EPHB4    | 7   | EPH receptor B4                                                                | Yes                        | 0.84                            | 0.58                                        | 0.40                                | 0.006046 | Yes                                  | Yes                                                  |
| 207257_at   | 2056   | EPO      | 7   | erythropoietin                                                                 | Yes                        | 0.47                            | 0.23                                        | 0.08                                | 0.00552  | Yes                                  | Yes                                                  |
| 37986_at    | 2057   | EPOR     | 19  | erythropoietin receptor                                                        | Yes                        | 0.95                            | 0.79                                        | 0.55                                | 0.00791  | Yes                                  | Yes                                                  |
| 218180_s_at | 64787  | EPS8L2   | 11  | EPS8-like 2                                                                    | Yes                        | 0.95                            | 0.72                                        | 0.63                                | 0.030498 | Yes                                  | Yes                                                  |
| 220012_at   | 56605  | ERO1LB   | 1   | ERO1-like beta ( <i>S. cerevisiae</i> )                                        | Yes                        | 0.58                            | 0.21                                        | 0.18                                | 0.009283 | Yes                                  | Yes                                                  |
| 208297_s_at | 7813   | EVI5     | 1   | ecotropic viral integration site 5                                             | Yes                        | 0.68                            | 0.28                                        | 0.20                                | 0.012637 | No                                   | No                                                   |
| 58696_at    | 54512  | EXOSC4   | 8   | exosome component 4<br>family with sequence similarity 162, member<br>A        | Yes                        | 0.74                            | 0.40                                        | 0.20                                | 0.000864 | Yes                                  | Yes                                                  |
| 221533_at   | 26355  | FAM162A  | 3   | family with sequence similarity 168, member<br>B                               | NA                         | 0.37                            | 0.04                                        | 0.05                                | 0.021117 | NA                                   | NA                                                   |
| 212017_at   | 130074 | FAM168B  | 2   | FERM, RhoGEF (ARHGEF) and pleckstrin<br>domain protein 1 (chondrocyte-derived) | NA                         | 0.74                            | 0.54                                        | 0.35                                | 0.032585 | NA                                   | NA                                                   |
| 201910_at   | 10160  | FARP1    | 13  | phenylalanyl-tRNA synthetase 2,<br>mitochondrial                               | NA                         | 1.00                            | 0.82                                        | 0.73                                | 0.023381 | NA                                   | NA                                                   |
| 204282_s_at | 10667  | FARS2    | 6   | phenylalanyl-tRNA synthetase, alpha subunit                                    | Yes                        | 0.95                            | 0.77                                        | 0.70                                | 0.038043 | Yes                                  | Yes                                                  |
| 202159_at   | 2193   | FARSA    | 19  | phenylalanyl-tRNA synthetase, alpha subunit                                    | NA                         | 0.89                            | 0.11                                        | 0.23                                | 0.000321 | NA                                   | NA                                                   |
| 216602_s_at | 2193   | FARSA    | 19  | phenylalanyl-tRNA synthetase, alpha subunit                                    | NA                         | 0.42                            | 0.04                                        | 0.05                                | 0.001211 | NA                                   | NA                                                   |
| 218255_s_at | 64319  | FBRS     | 16  | fibrosin                                                                       | NA                         | 0.42                            | 0.46                                        | 0.20                                | 0.046958 | NA                                   | NA                                                   |
| 207804_s_at | 2220   | FCN2     | 9   | ficolin (collagen/fibrinogen domain containing)<br>lectin 2 (hucolin)          | Yes                        | 1.00                            | 0.93                                        | 0.78                                | 0.02545  | No                                   | No                                                   |
| 205866_at   | 8547   | FCN3     | 1   | ficolin (collagen/fibrinogen domain containing)<br>3 (Hakata antigen)          | Yes                        | 1.00                            | 0.86                                        | 0.70                                | 0.014237 | No                                   | Yes                                                  |
| 203115_at   | 2235   | FECH     | 18  | ferrochelataase (protoporphyrin)                                               | Yes                        | 0.53                            | 0.14                                        | 0.15                                | 0.022724 | Yes                                  | Yes                                                  |
| 214212_x_at | 10979  | FERMT2   | 14  | fermitin family homolog 2 ( <i>Drosophila</i> )                                | NA                         | 1.00                            | 0.96                                        | 0.88                                | 0.045297 | NA                                   | NA                                                   |
| 215602_at   | 221472 | FGD2     | 6   | FYVE, RhoGEF and PH domain containing 2                                        | Yes                        | 0.37                            | 0.26                                        | 0.05                                | 0.047662 | No                                   | No                                                   |
| 204422_s_at | 2247   | FGF2     | 4   | fibroblast growth factor 2 (basic)                                             | Yes                        | 0.79                            | 0.51                                        | 0.40                                | 0.027978 | Yes                                  | Yes                                                  |
| 210311_at   | 2250   | FGF5     | 4   | fibroblast growth factor 5<br>fibroblast growth factor (acidic) intracellular  | Yes                        | 0.21                            | 0.07                                        | 0.00                                | 0.024182 | Yes                                  | Yes                                                  |
| 202041_s_at | 9158   | FIBP     | 11  | binding protein                                                                | NA                         | 1.00                            | 0.88                                        | 0.80                                | 0.042706 | NA                                   | NA                                                   |
| 200894_s_at | 2288   | FKBP4    | 12  | FK506 binding protein 4, 59kDa                                                 | Yes                        | 1.00                            | 0.65                                        | 0.63                                | 0.025613 | Yes                                  | Yes                                                  |
| 220719_at   | 80079  | FLJ13769 | 12  | hypothetical protein FLJ13769                                                  | NA                         | 0.68                            | 0.40                                        | 0.20                                | 0.002255 | NA                                   | NA                                                   |
| 220838_at   | 54932  | FLJ20433 | 9   | hypothetical protein FLJ20433                                                  | Yes                        | 0.26                            | 0.40                                        | 0.03                                | 0.027616 | Yes                                  | Yes                                                  |
| 218843_at   | 64838  | FNDC4    | 2   | fibronectin type III domain containing 4                                       | Yes                        | 0.74                            | 0.21                                        | 0.08                                | 1.12E-05 | No                                   | No                                                   |

Supplemental Table I

| ProbeSet    | Entrez | Symbol     | Chr | Gene name                                                                        | Gene in<br>NCBI<br>dataset | Proportion<br>Present<br>Normal | Proportion<br>Present<br>Pre-<br>neoplastic | Proportion<br>Present<br>Neoplastic | q-value  | CpG<br>islands<br>(Takai &<br>Jones) | CpG<br>islands<br>(Gardiner-<br>Garden &<br>Frommer) |
|-------------|--------|------------|-----|----------------------------------------------------------------------------------|----------------------------|---------------------------------|---------------------------------------------|-------------------------------------|----------|--------------------------------------|------------------------------------------------------|
| 204667_at   | 3169   | FOXA1      | 14  | forkhead box A1                                                                  | Yes                        | 1.00                            | 0.35                                        | 0.48                                | 0.024223 | Yes                                  | Yes                                                  |
| 205119_s_at | 2357   | FPR1       | 19  | formyl peptide receptor 1                                                        | Yes                        | 0.84                            | 0.84                                        | 0.60                                | 0.034507 | No                                   | No                                                   |
| 218103_at   | 117246 | FTSJ3      | 17  | FtsJ homolog 3 (E. coli)                                                         | Yes                        | 0.95                            | 0.81                                        | 0.65                                | 0.031185 | Yes                                  | Yes                                                  |
| 201945_at   | 5045   | FURIN      | 15  | furin (paired basic amino acid cleaving<br>enzyme)                               | Yes                        | 0.89                            | 0.75                                        | 0.60                                | 0.041723 | No                                   | No                                                   |
| 207434_s_at | 486    | FXVD2      | 11  | FXVD domain containing ion transport<br>regulator 2                              | Yes                        | 1.00                            | 1.00                                        | 0.88                                | 0.029437 | No                                   | No                                                   |
| 202488_s_at | 5349   | FXVD3      | 19  | FXVD domain containing ion transport<br>regulator 3                              | Yes                        | 0.89                            | 0.46                                        | 0.40                                | 0.012637 | No                                   | No                                                   |
| 221453_at   | 57818  | G6PC2      | 2   | glucose-6-phosphatase, catalytic, 2                                              | Yes                        | 0.63                            | 0.37                                        | 0.20                                | 0.013482 | No                                   | No                                                   |
| 202812_at   | 2548   | GAA        | 17  | glucosidase, alpha; acid<br>growth arrest and DNA-damage-inducible,              | Yes                        | 1.00                            | 0.96                                        | 0.80                                | 0.011606 | Yes                                  | Yes                                                  |
| 204121_at   | 10912  | GADD45G    | 9   | gamma<br>growth arrest and DNA-damage-inducible,                                 | Yes                        | 0.84                            | 0.89                                        | 0.60                                | 0.041647 | Yes                                  | Yes                                                  |
| 212891_s_at | 90480  | GADD45GIP1 | 19  | gamma interacting protein 1                                                      | Yes                        | 0.95                            | 0.70                                        | 0.63                                | 0.047859 | Yes                                  | Yes                                                  |
| 205354_at   | 2593   | GAMT       | 19  | guanidinoacetate N-methyltransferase<br>GTPase activating Rap/RanGAP domain-like | Yes                        | 1.00                            | 1.00                                        | 0.88                                | 0.037847 | Yes                                  | Yes                                                  |
| 215162_at   | 253959 | GARNL1     | 14  | 1                                                                                | Yes                        | 0.58                            | 0.28                                        | 0.23                                | 0.036727 | Yes                                  | Yes                                                  |
| 31874_at    | 10634  | GAS2L1     | 22  | growth arrest-specific 2 like 1                                                  | Yes                        | 0.84                            | 0.60                                        | 0.45                                | 0.035218 | Yes                                  | Yes                                                  |
| 218131_s_at | 54815  | GATAD2A    | 19  | GATA zinc finger domain containing 2A                                            | Yes                        | 0.79                            | 0.67                                        | 0.28                                | 0.000373 | No                                   | Yes                                                  |
| 203500_at   | 2639   | GCDH       | 19  | glutaryl-Coenzyme A dehydrogenase                                                | Yes                        | 0.74                            | 0.44                                        | 0.38                                | 0.030813 | Yes                                  | Yes                                                  |
| 206867_at   | 2646   | GCKR       | 2   | glucokinase (hexokinase 4) regulator                                             | Yes                        | 1.00                            | 1.00                                        | 0.88                                | 0.015496 | Yes                                  | Yes                                                  |
| 210627_s_at | 7841   | GCS1       | 2   | glucosidase I<br>glucose-fructose oxidoreductase domain                          | Yes                        | 0.68                            | 0.09                                        | 0.05                                | 1.79E-05 | Yes                                  | Yes                                                  |
| 221028_s_at | 81577  | GFOD2      | 16  | containing 2<br>glutamine-fructose-6-phosphate transaminase                      | Yes                        | 0.37                            | 0.19                                        | 0.05                                | 0.016238 | Yes                                  | Yes                                                  |
| 202721_s_at | 2673   | GFPT1      | 2   | 1<br>golgi associated, gamma adaptin ear                                         | Yes                        | 0.79                            | 0.16                                        | 0.10                                | 1.48E-05 | Yes                                  | Yes                                                  |
| 217560_at   | 26088  | GGA1       | 22  | containing, ARF binding protein 1<br>golgi associated, gamma adaptin ear         | Yes                        | 0.84                            | 0.19                                        | 0.33                                | 0.010367 | Yes                                  | Yes                                                  |
| 214189_s_at | 23062  | GGA2       | 16  | containing, ARF binding protein 2                                                | Yes                        | 0.16                            | 0.00                                        | 0.00                                | 0.020098 | Yes                                  | Yes                                                  |
| 208284_x_at | 2678   | GGT1       | 22  | gamma-glutamyltransferase 1                                                      | Yes                        | 1.00                            | 1.00                                        | 0.88                                | 0.018759 | No                                   | No                                                   |
| 209919_x_at | 2678   | GGT1       | 22  | gamma-glutamyltransferase 1                                                      | Yes                        | 1.00                            | 1.00                                        | 0.85                                | 0.016151 | No                                   | No                                                   |
| 211417_x_at | 2678   | GGT1       | 22  | gamma-glutamyltransferase 1                                                      | Yes                        | 1.00                            | 1.00                                        | 0.80                                | 0.003874 | No                                   | No                                                   |
| 213552_at   | 26035  | GLCE       | 15  | glucuronic acid epimerase                                                        | Yes                        | 0.95                            | 0.81                                        | 0.58                                | 0.014172 | Yes                                  | Yes                                                  |
| 204875_s_at | 2762   | GMDS       | 6   | GDP-mannose 4,6-dehydratase                                                      | Yes                        | 1.00                            | 0.70                                        | 0.68                                | 0.019177 | Yes                                  | Yes                                                  |
| 218070_s_at | 29926  | GMPPA      | 2   | GDP-mannose pyrophosphorylase A                                                  | Yes                        | 1.00                            | 0.56                                        | 0.45                                | 0.001176 | Yes                                  | Yes                                                  |
| 219920_s_at | 29925  | GMPPB      | 3   | GDP-mannose pyrophosphorylase B                                                  | NA                         | 0.95                            | 0.46                                        | 0.30                                | 4.80E-05 | NA                                   | NA                                                   |
| 213944_x_at | 2767   | GNA11      | 19  | guanine nucleotide binding protein (G protein),<br>alpha 11 (Gq class)           | Yes                        | 0.89                            | 0.86                                        | 0.60                                | 0.013498 | Yes                                  | Yes                                                  |



Supplemental Table I

| ProbeSet    | Entrez | Symbol   | Chr | Gene name                                                                                                                                        | Gene in<br>NCBI<br>dataset | Proportion<br>Present<br>Normal | Proportion<br>Present<br>Pre-<br>neoplastic | Proportion<br>Present<br>Neoplastic | q-value  | CpG<br>islands<br>(Takai &<br>Jones) | CpG<br>islands<br>(Gardiner-<br>Garden &<br>Frommer) |
|-------------|--------|----------|-----|--------------------------------------------------------------------------------------------------------------------------------------------------|----------------------------|---------------------------------|---------------------------------------------|-------------------------------------|----------|--------------------------------------|------------------------------------------------------|
| 205010_at   | 54552  | GNL3L    | X   | guanine nucleotide binding protein-like 3<br>(nucleolar)-like                                                                                    | Yes                        | 0.95                            | 0.68                                        | 0.43                                | 0.002051 | Yes                                  | Yes                                                  |
| 46947_at    | 54552  | GNL3L    | X   | guanine nucleotide binding protein-like 3<br>(nucleolar)-like                                                                                    | Yes                        | 0.79                            | 0.23                                        | 0.30                                | 0.010226 | Yes                                  | Yes                                                  |
| 35436_at    | 2801   | GOLGA2   | 9   | golgi autoantigen, golgin subfamily a, 2                                                                                                         | Yes                        | 0.84                            | 0.84                                        | 0.65                                | 0.030066 | Yes                                  | Yes                                                  |
| 202106_at   | 2802   | GOLGA3   | 12  | golgi autoantigen, golgin subfamily a, 3                                                                                                         | Yes                        | 0.89                            | 0.68                                        | 0.40                                | 0.002156 | Yes                                  | Yes                                                  |
| 204324_s_at | 27333  | GOLIM4   | 3   | golgi integral membrane protein 4                                                                                                                | NA                         | 0.79                            | 0.56                                        | 0.23                                | 0.00023  | NA                                   | NA                                                   |
| 202756_s_at | 2817   | GPC1     | 2   | glypican 1                                                                                                                                       | Yes                        | 0.53                            | 0.75                                        | 0.33                                | 0.029088 | Yes                                  | Yes                                                  |
| 210640_s_at | 2852   | GPBR     | 7   | G protein-coupled estrogen receptor 1                                                                                                            | NA                         | 0.74                            | 0.04                                        | 0.20                                | 0.00303  | NA                                   | NA                                                   |
| 219898_at   | 54329  | GPR85    | 7   | G protein-coupled receptor 85                                                                                                                    | Yes                        | 0.21                            | 0.02                                        | 0.03                                | 0.047108 | No                                   | No                                                   |
| 217782_s_at | 2873   | GPS1     | 17  | G protein pathway suppressor 1                                                                                                                   | Yes                        | 1.00                            | 0.56                                        | 0.53                                | 0.029632 | Yes                                  | Yes                                                  |
| 220794_at   | 64388  | GREM2    | 1   | gremlin 2, cysteine knot superfamily, homolog<br>(Xenopus laevis)                                                                                | Yes                        | 0.47                            | 0.53                                        | 0.10                                | 0.003874 | Yes                                  | Yes                                                  |
| 202044_at   | 2909   | GRLF1    | 19  | glucocorticoid receptor DNA binding factor 1                                                                                                     | Yes                        | 0.58                            | 0.14                                        | 0.10                                | 0.000425 | No                                   | Yes                                                  |
| 218154_at   | 79792  | GSDMD    | 8   | gasdermin D                                                                                                                                      | NA                         | 0.95                            | 0.60                                        | 0.55                                | 0.027645 | NA                                   | NA                                                   |
| 209945_s_at | 2932   | GSK3B    | 3   | glycogen synthase kinase 3 beta                                                                                                                  | Yes                        | 1.00                            | 0.98                                        | 0.83                                | 0.017672 | Yes                                  | Yes                                                  |
| 205541_s_at | 23708  | GSPT2    | X   | G1 to S phase transition 2                                                                                                                       | Yes                        | 1.00                            | 0.96                                        | 0.78                                | 0.011118 | Yes                                  | Yes                                                  |
| 210963_s_at | 8908   | GYG2     | X   | glycogenin 2                                                                                                                                     | Yes                        | 0.32                            | 0.02                                        | 0.05                                | 0.022908 | Yes                                  | Yes                                                  |
| 210964_s_at | 8908   | GYG2     | X   | glycogenin 2                                                                                                                                     | Yes                        | 0.74                            | 0.09                                        | 0.15                                | 0.000475 | Yes                                  | Yes                                                  |
| 208630_at   | 3030   | HADHA    | 2   | hydroxyacyl-Coenzyme A dehydrogenase/3-<br>ketoacyl-Coenzyme A thiolase/enoyl-<br>Coenzyme A hydratase (trifunctional protein),<br>alpha subunit | Yes                        | 0.95                            | 0.98                                        | 0.75                                | 0.002723 | Yes                                  | Yes                                                  |
| 216063_at   | 3044   | HBBP1    | 11  | hemoglobin, beta pseudogene 1<br>HECT, C2 and WW domain containing E3                                                                            | Yes                        | 0.42                            | 0.18                                        | 0.13                                | 0.023962 | No                                   | No                                                   |
| 210331_at   | 23072  | HECW1    | 7   | ubiquitin protein ligase 1                                                                                                                       | Yes                        | 0.37                            | 0.02                                        | 0.03                                | 0.000688 | Yes                                  | Yes                                                  |
| 203674_at   | 9931   | HELZ     | 17  | helicase with zinc finger                                                                                                                        | Yes                        | 0.63                            | 0.79                                        | 0.38                                | 0.02755  | Yes                                  | Yes                                                  |
| 52159_at    | 51409  | HEMK1    | 3   | HemK methyltransferase family member 1                                                                                                           | Yes                        | 1.00                            | 0.67                                        | 0.63                                | 0.018865 | Yes                                  | Yes                                                  |
| 212596_s_at | 10042  | HMG2L1   | 22  | high-mobility group protein 2-like 1                                                                                                             | Yes                        | 1.00                            | 1.00                                        | 0.95                                | 0.040984 | Yes                                  | Yes                                                  |
| 203665_at   | 3162   | HMOX1    | 22  | heme oxygenase (decycling) 1<br>hematological and neurological expressed 1-                                                                      | Yes                        | 1.00                            | 0.93                                        | 0.68                                | 0.001621 | Yes                                  | Yes                                                  |
| 212109_at   | 90861  | HN1L     | 16  | like                                                                                                                                             | NA                         | 0.95                            | 0.79                                        | 0.43                                | 8.21E-05 | NA                                   | NA                                                   |
| 210515_at   | 6927   | HNF1A    | 12  | HNF1 homeobox A                                                                                                                                  | NA                         | 0.95                            | 0.05                                        | 0.35                                | 0.006624 | NA                                   | NA                                                   |
| 216930_at   | 6927   | HNF1A    | 12  | HNF1 homeobox A                                                                                                                                  | NA                         | 0.37                            | 0.00                                        | 0.05                                | 0.006016 | NA                                   | NA                                                   |
| 214918_at   | 4670   | HNRNPM   | 19  | heterogeneous nuclear ribonucleoprotein M<br>heterogeneous nuclear ribonucleoprotein U-                                                          | NA                         | 0.95                            | 0.56                                        | 0.38                                | 0.003365 | NA                                   | NA                                                   |
| 66053_at    | 221092 | HNRNPUL2 | 11  | like 2                                                                                                                                           | NA                         | 0.26                            | 0.12                                        | 0.03                                | 0.03686  | NA                                   | NA                                                   |
| 205462_s_at | 3241   | HPCAL1   | 2   | hippocalcin-like 1                                                                                                                               | Yes                        | 0.32                            | 0.40                                        | 0.10                                | 0.043492 | Yes                                  | Yes                                                  |
| 213926_s_at | 3267   | HRB      | 2   | HIV-1 Rev binding protein                                                                                                                        | Yes                        | 0.74                            | 0.75                                        | 0.50                                | 0.038733 | Yes                                  | Yes                                                  |

Supplemental Table I

| ProbeSet    | Entrez | Symbol   | Chr | Gene name                                                                                   | Gene in<br>NCBI<br>dataset | Proportion<br>Present<br>Normal | Proportion<br>Present<br>Pre-<br>neoplastic | Proportion<br>Present<br>Neoplastic | q-value  | CpG<br>islands<br>(Takai &<br>Jones) | CpG<br>islands<br>(Gardiner-<br>Garden &<br>Frommer) |
|-------------|--------|----------|-----|---------------------------------------------------------------------------------------------|----------------------------|---------------------------------|---------------------------------------------|-------------------------------------|----------|--------------------------------------|------------------------------------------------------|
| 221169_s_at | 59340  | HRH4     | 18  | histamine receptor H4<br>heparan sulfate (glucosamine) 3-O-                                 | Yes                        | 0.32                            | 0.07                                        | 0.08                                | 0.04004  | No                                   | No                                                   |
| 221062_at   | 9953   | HS3ST3B1 | 17  | sulfotransferase 3B1                                                                        | Yes                        | 0.21                            | 0.04                                        | 0.00                                | 0.026585 | Yes                                  | Yes                                                  |
| 215436_at   | 84263  | HSDL2    | 9   | hydroxysteroid dehydrogenase like 2<br>heat shock protein 90kDa beta (Grp94),               | Yes                        | 1.00                            | 0.81                                        | 0.68                                | 0.027616 | Yes                                  | Yes                                                  |
| 216450_x_at | 7184   | HSP90B1  | 12  | member 1                                                                                    | Yes                        | 0.95                            | 0.95                                        | 0.73                                | 0.010606 | Yes                                  | Yes                                                  |
| 211152_s_at | 27429  | HTRA2    | 2   | HtrA serine peptidase 2                                                                     | NA                         | 1.00                            | 0.98                                        | 0.88                                | 0.038733 | NA                                   | NA                                                   |
| 202389_s_at | 3064   | HTT      | 4   | huntingtin<br>inhibitor of Bruton agammaglobulinemia                                        | NA                         | 0.21                            | 0.04                                        | 0.03                                | 0.046069 | NA                                   | NA                                                   |
| 215086_at   | 25998  | IBTK     | 6   | tyrosine kinase                                                                             | Yes                        | 0.89                            | 0.70                                        | 0.55                                | 0.014718 | Yes                                  | Yes                                                  |
| 201609_x_at | 23463  | ICMT     | 1   | isoprenylcysteine carboxyl methyltransferase<br>isocitrate dehydrogenase 2 (NADP+),         | Yes                        | 0.84                            | 0.46                                        | 0.43                                | 0.030179 | Yes                                  | Yes                                                  |
| 210045_at   | 3418   | IDH2     | 15  | mitochondrial                                                                               | Yes                        | 0.74                            | 0.00                                        | 0.03                                | 2.10E-07 | Yes                                  | Yes                                                  |
| 202070_s_at | 3419   | IDH3A    | 15  | isocitrate dehydrogenase 3 (NAD+) alpha                                                     | Yes                        | 0.89                            | 0.72                                        | 0.50                                | 0.005686 | Yes                                  | Yes                                                  |
| 217631_at   | 91734  | IDI2     | 10  | isopentenyl-diphosphate delta isomerase 2<br>immediate early response 3 interacting protein | Yes                        | 0.42                            | 0.26                                        | 0.08                                | 0.040794 | Yes                                  | Yes                                                  |
| 211406_at   | 51124  | IER3IP1  | 18  | 1                                                                                           | Yes                        | 1.00                            | 0.93                                        | 0.85                                | 0.048207 | Yes                                  | Yes                                                  |
| 204786_s_at | 3455   | IFNAR2   | 21  | interferon (alpha, beta and omega) receptor 2<br>intraflagellar transport 74 homolog        | Yes                        | 0.89                            | 0.86                                        | 0.30                                | 5.66E-06 | Yes                                  | Yes                                                  |
| 61732_r_at  | 80173  | IFT74    | 9   | (Chlamydomonas)                                                                             | Yes                        | 0.95                            | 0.89                                        | 0.73                                | 0.033833 | Yes                                  | Yes                                                  |
| 209542_x_at | 3479   | IGF1     | 12  | insulin-like growth factor 1 (somatomedin C)                                                | Yes                        | 1.00                            | 0.95                                        | 0.58                                | 4.55E-05 | No                                   | No                                                   |
| 211577_s_at | 3479   | IGF1     | 12  | insulin-like growth factor 1 (somatomedin C)                                                | Yes                        | 0.95                            | 0.96                                        | 0.65                                | 0.001212 | No                                   | No                                                   |
| 214669_x_at | 3514   | IGKC     | 2   | immunoglobulin kappa constant                                                               | NA                         | 1.00                            | 1.00                                        | 0.88                                | 0.04646  | NA                                   | NA                                                   |
| 212439_at   | 9807   | IHPK1    | 3   | inositol hexaphosphate kinase 1                                                             | Yes                        | 0.47                            | 0.02                                        | 0.03                                | 0.000542 | Yes                                  | Yes                                                  |
| 218192_at   | 51447  | IHPK2    | 3   | inositol hexaphosphate kinase 2                                                             | Yes                        | 1.00                            | 0.98                                        | 0.80                                | 0.007676 | Yes                                  | Yes                                                  |
| 205707_at   | 23765  | IL17RA   | 22  | interleukin 17 receptor A                                                                   | Yes                        | 0.37                            | 0.19                                        | 0.00                                | 0.001642 | Yes                                  | Yes                                                  |
| 207526_s_at | 9173   | IL1RL1   | 2   | interleukin 1 receptor-like 1                                                               | Yes                        | 0.63                            | 0.88                                        | 0.33                                | 0.004559 | No                                   | No                                                   |
| 207538_at   | 3565   | IL4      | 5   | interleukin 4                                                                               | Yes                        | 0.79                            | 0.00                                        | 0.00                                | 8.78E-09 | No                                   | No                                                   |
| 203233_at   | 3566   | IL4R     | 16  | interleukin 4 receptor                                                                      | Yes                        | 0.89                            | 0.91                                        | 0.50                                | 0.0013   | Yes                                  | Yes                                                  |
| 217489_s_at | 3570   | IL6R     | 1   | interleukin 6 receptor                                                                      | Yes                        | 0.16                            | 0.02                                        | 0.00                                | 0.016713 | Yes                                  | Yes                                                  |
| 202993_at   | 10994  | ILVBL    | 19  | ilvB (bacterial acetolactate synthase)-like                                                 | NA                         | 1.00                            | 0.93                                        | 0.58                                | 8.46E-05 | NA                                   | NA                                                   |
| 209808_x_at | 3621   | ING1     | 13  | inhibitor of growth family, member 1                                                        | Yes                        | 0.89                            | 0.79                                        | 0.53                                | 0.002776 | Yes                                  | Yes                                                  |
| 205981_s_at | 3622   | ING2     | 4   | inhibitor of growth family, member 2                                                        | Yes                        | 1.00                            | 0.96                                        | 0.83                                | 0.030188 | Yes                                  | Yes                                                  |
| 202809_s_at | 65123  | INTS3    | 1   | integrator complex subunit 3                                                                | Yes                        | 0.84                            | 0.54                                        | 0.33                                | 0.000893 | Yes                                  | Yes                                                  |
| 210114_at   | 27130  | INVS     | 9   | inversin                                                                                    | Yes                        | 1.00                            | 0.82                                        | 0.70                                | 0.025316 | Yes                                  | Yes                                                  |

Supplemental Table I

| ProbeSet    | Entrez    | Symbol   | Chr | Gene name                                     | Gene in<br>NCBI<br>dataset | Proportion                      |                                  |                                     | q-value  | CpG<br>islands<br>(Takai &<br>Jones) | CpG<br>islands<br>(Gardiner-<br>Garden &<br>Frommer) |
|-------------|-----------|----------|-----|-----------------------------------------------|----------------------------|---------------------------------|----------------------------------|-------------------------------------|----------|--------------------------------------|------------------------------------------------------|
|             |           |          |     |                                               |                            | Proportion<br>Present<br>Normal | Proportion<br>Pre-<br>neoplastic | Proportion<br>Present<br>Neoplastic |          |                                      |                                                      |
|             |           |          |     | IQ motif containing GTPase activating protein |                            |                                 |                                  |                                     |          |                                      |                                                      |
| 213446_s_at | 8826      | IQGAP1   | 15  | 1                                             | Yes                        | 0.95                            | 0.98                             | 0.80                                | 0.032847 | Yes                                  | Yes                                                  |
| 213817_at   | 11213     | IRAK3    | 12  | interleukin-1 receptor-associated kinase 3    | Yes                        | 0.95                            | 0.95                             | 0.73                                | 0.023319 | Yes                                  | Yes                                                  |
| 209297_at   | 6453      | ITSN1    | 21  | intersectin 1 (SH3 domain protein)            | Yes                        | 1.00                            | 0.84                             | 0.68                                | 0.010071 | Yes                                  | Yes                                                  |
| 203682_s_at | 3712      | IVD      | 15  | isovaleryl Coenzyme A dehydrogenase           | Yes                        | 1.00                            | 0.75                             | 0.48                                | 0.000187 | Yes                                  | Yes                                                  |
| 201643_x_at | 51780     | JMJD1B   | 5   | jumonji domain containing 1B                  | Yes                        | 0.89                            | 0.96                             | 0.68                                | 0.036799 | Yes                                  | Yes                                                  |
| 212492_s_at | 23030     | JMJD2B   | 19  | jumonji domain containing 2B                  | Yes                        | 1.00                            | 0.88                             | 0.68                                | 0.012353 | Yes                                  | Yes                                                  |
| 212496_s_at | 23030     | JMJD2B   | 19  | jumonji domain containing 2B                  | Yes                        | 0.68                            | 0.11                             | 0.08                                | 6.17E-05 | Yes                                  | Yes                                                  |
|             |           |          |     | jumonji domain containing 3, histone lysine   |                            |                                 |                                  |                                     |          |                                      |                                                      |
| 41386_i_at  | 23135     | JMJD3    | 17  | demethylase                                   | Yes                        | 1.00                            | 1.00                             | 0.90                                | 0.034017 | No                                   | No                                                   |
| 220070_at   | 79831     | JMJD5    | 16  | jumonji domain containing 5                   | Yes                        | 0.74                            | 0.26                             | 0.30                                | 0.009509 | Yes                                  | Yes                                                  |
| 60528_at    | 100137047 | JMJD7    | 15  | jumonji domain containing 7                   | NA                         | 1.00                            | 1.00                             | 0.85                                | 0.020384 | NA                                   | NA                                                   |
| 213281_at   | 3725      | JUN      | 1   | jun oncogene                                  | Yes                        | 0.95                            | 1.00                             | 0.80                                | 0.046377 | Yes                                  | Yes                                                  |
|             |           |          |     | kelch repeat and BTB (POZ) domain             |                            |                                 |                                  |                                     |          |                                      |                                                      |
| 204301_at   | 9920      | KBTBD11  | 8   | containing 11                                 | Yes                        | 0.58                            | 0.18                             | 0.08                                | 0.00142  | Yes                                  | Yes                                                  |
|             |           |          |     | potassium voltage-gated channel, Shab-        |                            |                                 |                                  |                                     |          |                                      |                                                      |
| 211006_s_at | 3745      | KCNB1    | 20  | related subfamily, member 1                   | Yes                        | 0.89                            | 0.49                             | 0.53                                | 0.022197 | Yes                                  | Yes                                                  |
|             |           |          |     | potassium inwardly-rectifying channel,        |                            |                                 |                                  |                                     |          |                                      |                                                      |
| 207141_s_at | 3760      | KCNJ3    | 2   | subfamily J, member 3                         | Yes                        | 0.37                            | 0.05                             | 0.03                                | 0.005914 | Yes                                  | Yes                                                  |
|             |           |          |     | potassium intermediate/small conductance      |                            |                                 |                                  |                                     |          |                                      |                                                      |
|             |           |          |     | calcium-activated channel, subfamily N,       |                            |                                 |                                  |                                     |          |                                      |                                                      |
| 220116_at   | 3781      | KCNN2    | 5   | member 2                                      | Yes                        | 1.00                            | 0.18                             | 0.23                                | 5.45E-05 | Yes                                  | Yes                                                  |
| 212735_at   | 9711      | KIAA0226 | 3   | KIAA0226                                      | Yes                        | 0.84                            | 0.49                             | 0.35                                | 0.003419 | Yes                                  | Yes                                                  |
| 213242_x_at | 283638    | KIAA0284 | 14  | KIAA0284                                      | Yes                        | 1.00                            | 0.77                             | 0.75                                | 0.049775 | Yes                                  | Yes                                                  |
| 202128_at   | 9870      | KIAA0317 | 14  | KIAA0317                                      | Yes                        | 0.89                            | 0.54                             | 0.45                                | 0.007854 | No                                   | Yes                                                  |
| 204308_s_at | 9895      | KIAA0329 | 14  | KIAA0329                                      | NA                         | 0.74                            | 0.07                             | 0.15                                | 0.001886 | NA                                   | NA                                                   |
| 214897_at   | 57239     | KIAA0506 | NA  | hypothetical LOC57239                         | NA                         | 0.26                            | 0.04                             | 0.03                                | 0.024182 | NA                                   | NA                                                   |
| 203364_s_at | 9776      | KIAA0652 | 11  | KIAA0652                                      | Yes                        | 0.95                            | 0.91                             | 0.80                                | 0.031006 | Yes                                  | Yes                                                  |
| 202962_at   | 23303     | KIF13B   | 8   | kinesin family member 13B                     | Yes                        | 0.89                            | 0.32                             | 0.43                                | 0.032847 | Yes                                  | Yes                                                  |
| 220374_at   | 54813     | KLHL28   | 14  | kelch-like 28 (Drosophila)                    | NA                         | 0.16                            | 0.04                             | 0.00                                | 0.027989 | NA                                   | NA                                                   |
| 220682_s_at | 51088     | KLHL5    | 4   | kelch-like 5 (Drosophila)                     | Yes                        | 0.26                            | 0.00                             | 0.00                                | 0.001421 | Yes                                  | Yes                                                  |
| 202056_at   | 3836      | KPNA1    | 3   | karyopherin alpha 1 (importin alpha 5)        | Yes                        | 1.00                            | 0.84                             | 0.78                                | 0.038043 | Yes                                  | Yes                                                  |
| 212101_at   | 23633     | KPNA6    | 1   | karyopherin alpha 6 (importin alpha 7)        | Yes                        | 0.84                            | 0.93                             | 0.55                                | 0.000934 | Yes                                  | Yes                                                  |
| 212103_at   | 23633     | KPNA6    | 1   | karyopherin alpha 6 (importin alpha 7)        | Yes                        | 0.68                            | 0.18                             | 0.08                                | 0.000146 | Yes                                  | Yes                                                  |
| 207908_at   | 3849      | KRT2     | 12  | keratin 2                                     | Yes                        | 0.37                            | 0.02                             | 0.03                                | 0.002665 | No                                   | Yes                                                  |
| 219061_s_at | 8270      | LAGE3    | X   | L antigen family, member 3                    | Yes                        | 0.84                            | 0.61                             | 0.50                                | 0.021252 | Yes                                  | Yes                                                  |
| 211651_s_at | 3912      | LAMB1    | 7   | laminin, beta 1                               | Yes                        | 1.00                            | 0.98                             | 0.85                                | 0.021117 | Yes                                  | Yes                                                  |
| 216264_s_at | 3913      | LAMB2    | 3   | laminin, beta 2 (laminin S)                   | Yes                        | 1.00                            | 0.93                             | 0.80                                | 0.012543 | No                                   | Yes                                                  |
| 204428_s_at | 3931      | LCAT     | 16  | lecithin-cholesterol acyltransferase          | Yes                        | 0.79                            | 0.54                             | 0.08                                | 2.97E-06 | No                                   | Yes                                                  |
| 202067_s_at | 3949      | LDLR     | 19  | low density lipoprotein receptor              | Yes                        | 0.74                            | 0.68                             | 0.38                                | 0.009611 | Yes                                  | Yes                                                  |

Supplemental Table I

| ProbeSet    | Entrez | Symbol    | Chr | Gene name                                                                              | Gene in<br>NCBI<br>dataset | Proportion<br>Present<br>Normal | Proportion<br>Present<br>Pre-<br>neoplastic | Proportion<br>Present<br>Neoplastic | q-value  | CpG<br>islands<br>(Takai &<br>Jones) | CpG<br>islands<br>(Gardiner-<br>Garden &<br>Frommer) |
|-------------|--------|-----------|-----|----------------------------------------------------------------------------------------|----------------------------|---------------------------------|---------------------------------------------|-------------------------------------|----------|--------------------------------------|------------------------------------------------------|
| 217173_s_at | 3949   | LDLR      | 19  | low density lipoprotein receptor<br>leucine zipper-EF-hand containing                  | Yes                        | 0.37                            | 0.60                                        | 0.13                                | 0.034507 | Yes                                  | Yes                                                  |
| 222006_at   | 3954   | LETM1     | 4   | transmembrane protein 1                                                                | Yes                        | 0.84                            | 0.14                                        | 0.30                                | 0.006464 | Yes                                  | Yes                                                  |
| 220158_at   | 56891  | LGALS14   | 19  | lectin, galactoside-binding, soluble, 14                                               | Yes                        | 0.84                            | 0.32                                        | 0.35                                | 0.020098 | No                                   | No                                                   |
| 205876_at   | 3977   | LIFR      | 5   | leukemia inhibitory factor receptor alpha<br>leukocyte immunoglobulin-like receptor,   | Yes                        | 1.00                            | 1.00                                        | 0.85                                | 0.016151 | No                                   | Yes                                                  |
| 207857_at   | 11027  | LILRA2    | 19  | subfamily A (with TM domain), member 2                                                 | Yes                        | 0.84                            | 0.40                                        | 0.38                                | 0.020098 | No                                   | No                                                   |
| 212328_at   | 22998  | LIMCH1    | 4   | LIM and calponin homology domains 1                                                    | NA                         | 1.00                            | 1.00                                        | 0.83                                | 0.021117 | NA                                   | NA                                                   |
| 213855_s_at | 3991   | LIPE      | 19  | lipase, hormone-sensitive                                                              | Yes                        | 0.26                            | 0.07                                        | 0.00                                | 0.006016 | No                                   | No                                                   |
| 203713_s_at | 3993   | LLGL2     | 17  | lethal giant larvae homolog 2 (Drosophila)                                             | Yes                        | 1.00                            | 0.74                                        | 0.48                                | 0.000511 | Yes                                  | Yes                                                  |
| 209204_at   | 8543   | LMO4      | 1   | LIM domain only 4                                                                      | Yes                        | 0.53                            | 0.21                                        | 0.08                                | 0.006595 | Yes                                  | Yes                                                  |
| 216823_at   | 146053 | LOC146053 | 15  | similar to 40S ribosomal protein S3a                                                   | Yes                        | 0.95                            | 0.84                                        | 0.63                                | 0.013611 | No                                   | Yes                                                  |
| 215283_at   | 400642 | LOC400642 | 18  | hypothetical LOC400642                                                                 | NA                         | 0.84                            | 0.39                                        | 0.43                                | 0.045478 | NA                                   | NA                                                   |
| 208154_at   | 51336  | LOC51336  | 1   | mesenchymal stem cell protein DSCD28<br>similar to programmed cell death 6 interacting | NA                         | 0.68                            | 0.40                                        | 0.25                                | 0.00892  | NA                                   | NA                                                   |
| 217520_x_at | 731884 | LOC731884 | 15  | protein                                                                                | NA                         | 0.42                            | 0.12                                        | 0.13                                | 0.037826 | NA                                   | NA                                                   |
| 209017_s_at | 9361   | LONP1     | 19  | lon peptidase 1, mitochondrial                                                         | NA                         | 1.00                            | 1.00                                        | 0.83                                | 0.01401  | NA                                   | NA                                                   |
| 202793_at   | 10162  | LPCAT3    | 12  | lysophosphatidylcholine acyltransferase 3                                              | NA                         | 0.95                            | 0.51                                        | 0.53                                | 0.016713 | NA                                   | NA                                                   |
| 212272_at   | 23175  | LPIN1     | 2   | lipin 1<br>leucine-rich repeats and calponin homology                                  | Yes                        | 0.32                            | 0.11                                        | 0.03                                | 0.015244 | Yes                                  | Yes                                                  |
| 214739_at   | 84859  | LRCH3     | 3   | (CH) domain containing 3<br>leucine-rich repeats and immunoglobulin-like               | Yes                        | 1.00                            | 0.88                                        | 0.78                                | 0.034767 | Yes                                  | Yes                                                  |
| 211596_s_at | 26018  | LRIG1     | 3   | domains 1<br>low density lipoprotein receptor-related protein                          | NA                         | 0.95                            | 0.82                                        | 0.73                                | 0.020028 | NA                                   | NA                                                   |
| 205282_at   | 7804   | LRP8      | 1   | 8, apolipoprotein e receptor<br>latent transforming growth factor beta binding         | Yes                        | 1.00                            | 0.74                                        | 0.65                                | 0.028045 | Yes                                  | Yes                                                  |
| 210628_x_at | 8425   | LTBP4     | 19  | protein 4<br>lymphatic vessel endothelial hyaluronan                                   | Yes                        | 0.32                            | 0.60                                        | 0.13                                | 0.035758 | No                                   | No                                                   |
| 219059_s_at | 10894  | LYVE1     | 11  | receptor 1                                                                             | NA                         | 0.79                            | 0.51                                        | 0.30                                | 0.009025 | NA                                   | NA                                                   |
| 38398_at    | 8567   | MADD      | 11  | MAP-kinase activating death domain                                                     | Yes                        | 0.37                            | 0.11                                        | 0.08                                | 0.023701 | Yes                                  | Yes                                                  |
| 203668_at   | 4123   | MAN2C1    | 15  | mannosidase, alpha, class 2C, member 1                                                 | Yes                        | 1.00                            | 0.77                                        | 0.63                                | 0.004857 | Yes                                  | Yes                                                  |
| 215498_s_at | 5606   | MAP2K3    | 17  | mitogen-activated protein kinase kinase 3                                              | Yes                        | 1.00                            | 0.96                                        | 0.85                                | 0.03737  | Yes                                  | Yes                                                  |
| 215499_at   | 5606   | MAP2K3    | 17  | mitogen-activated protein kinase kinase 3<br>mitogen-activated protein kinase kinase   | Yes                        | 0.63                            | 0.61                                        | 0.23                                | 0.002955 | Yes                                  | Yes                                                  |
| 203514_at   | 4215   | MAP3K3    | 17  | kinase 3<br>mitogen-activated protein kinase kinase                                    | Yes                        | 0.89                            | 0.44                                        | 0.23                                | 3.76E-05 | Yes                                  | Yes                                                  |
| 203836_s_at | 4217   | MAP3K5    | 6   | kinase 5<br>mitogen-activated protein kinase-activated                                 | Yes                        | 1.00                            | 0.91                                        | 0.73                                | 0.003422 | Yes                                  | Yes                                                  |
| 212871_at   | 8550   | MAPKAPK5  | 12  | protein kinase 5                                                                       | NA                         | 0.79                            | 0.51                                        | 0.38                                | 0.013735 | NA                                   | NA                                                   |

Supplemental Table I

| ProbeSet    | Entrez | Symbol | Chr | Gene name                                                                       | Gene in<br>NCBI<br>dataset | Proportion<br>Present<br>Normal | Proportion |                    | q-value  | CpG<br>islands<br>(Takai &<br>Jones) | CpG<br>islands<br>(Gardiner-<br>Garden &<br>Frommer) |
|-------------|--------|--------|-----|---------------------------------------------------------------------------------|----------------------------|---------------------------------|------------|--------------------|----------|--------------------------------------|------------------------------------------------------|
|             |        |        |     |                                                                                 |                            |                                 | Present    | Pre-<br>neoplastic |          |                                      |                                                      |
| 202568_s_at | 4140   | MARK3  | 14  | MAP/microtubule affinity-regulating kinase 3                                    | Yes                        | 0.89                            | 0.95       | 0.70               | 0.048948 | Yes                                  | Yes                                                  |
| 210136_at   | 4155   | MBP    | 18  | myelin basic protein                                                            | Yes                        | 0.79                            | 0.96       | 0.55               | 0.003447 | Yes                                  | Yes                                                  |
| 214056_at   | 4170   | MCL1   | 1   | myeloid cell leukemia sequence 1 (BCL2-<br>related)                             | Yes                        | 0.53                            | 0.75       | 0.10               | 0.000825 | Yes                                  | Yes                                                  |
| 212269_s_at | 8888   | MCM3AP | 21  | minichromosome maintenance complex<br>component 3 associated protein            | NA                         | 0.37                            | 0.21       | 0.05               | 0.018865 | NA                                   | NA                                                   |
| 212831_at   | 1955   | MEGF9  | 9   | multiple EGF-like-domains 9                                                     | Yes                        | 0.89                            | 0.51       | 0.50               | 0.049937 | Yes                                  | Yes                                                  |
| 213457_at   | 9258   | MFHAS1 | 8   | malignant fibrous histiocytoma amplified<br>sequence 1                          | Yes                        | 0.89                            | 0.49       | 0.38               | 0.003597 | Yes                                  | Yes                                                  |
| 221192_x_at | 79157  | MFSD11 | 17  | major facilitator superfamily domain<br>containing 11                           | NA                         | 0.84                            | 0.74       | 0.50               | 0.040565 | NA                                   | NA                                                   |
| 44822_s_at  | 54531  | MIER2  | 19  | mesoderm induction early response 1, family<br>member 2                         | NA                         | 0.79                            | 0.42       | 0.38               | 0.028462 | NA                                   | NA                                                   |
| 215909_x_at | 50488  | MINK1  | 17  | misshapen-like kinase 1 (zebrafish)                                             | Yes                        | 0.53                            | 0.12       | 0.18               | 0.035096 | Yes                                  | Yes                                                  |
| 36830_at    | 4285   | MIPEP  | 13  | mitochondrial intermediate peptidase                                            | Yes                        | 1.00                            | 0.77       | 0.60               | 0.005429 | No                                   | No                                                   |
| 212076_at   | 4297   | MLL    | 11  | myeloid/lymphoid or mixed-lineage leukemia<br>(trithorax homolog, Drosophila)   | Yes                        | 0.63                            | 0.68       | 0.43               | 0.042684 | Yes                                  | Yes                                                  |
| 210752_s_at | 6945   | MLX    | 17  | MAX-like protein X                                                              | Yes                        | 1.00                            | 0.75       | 0.70               | 0.036512 | Yes                                  | Yes                                                  |
| 211774_s_at | 25974  | MMACHC | 1   | methylmalonic aciduria (cobalamin deficiency)<br>cblC type, with homocystinuria | NA                         | 1.00                            | 0.53       | 0.55               | 0.011358 | NA                                   | NA                                                   |
| 160020_at   | 4323   | MMP14  | 14  | matrix metalloproteinase 14 (membrane-<br>inserted)                             | Yes                        |                                 | 0.95       | 0.75               | 0.00142  | Yes                                  | Yes                                                  |
| 203644_s_at | 22879  | MON1B  | 16  | MON1 homolog B (yeast)                                                          | Yes                        | 0.63                            | 0.04       | 0.08               | 8.43E-05 | Yes                                  | Yes                                                  |
| 203686_at   | 4350   | MPG    | 16  | N-methylpurine-DNA glycosylase                                                  | Yes                        | 1.00                            | 0.65       | 0.63               | 0.0441   | No                                   | Yes                                                  |
| 202472_at   | 4351   | MPI    | 15  | mannose phosphate isomerase                                                     | Yes                        | 0.58                            | 0.16       | 0.15               | 0.020668 | Yes                                  | Yes                                                  |
| 218270_at   | 79590  | MRPL24 | 1   | mitochondrial ribosomal protein L24                                             | Yes                        | 1.00                            | 0.44       | 0.40               | 0.007432 | Yes                                  | Yes                                                  |
| 221997_s_at | 122704 | MRPL52 | 14  | mitochondrial ribosomal protein L52                                             | Yes                        | 0.42                            | 0.35       | 0.08               | 0.012601 | Yes                                  | Yes                                                  |
| 218001_at   | 51116  | MRPS2  | 9   | mitochondrial ribosomal protein S2                                              | NA                         | 0.95                            | 0.95       | 0.73               | 0.018801 | NA                                   | NA                                                   |
| 220688_s_at | 51154  | MRTO4  | 1   | mRNA turnover 4 homolog (S. cerevisiae)                                         | NA                         | 0.47                            | 0.53       | 0.15               | 0.01369  | NA                                   | NA                                                   |
| 210947_s_at | 4437   | MSH3   | 5   | mutS homolog 3 (E. coli)                                                        | NA                         | 1.00                            | 0.98       | 0.80               | 0.029528 | NA                                   | NA                                                   |
| 210472_at   | 4495   | MT1G   | 16  | metallothionein 1G                                                              | Yes                        | 0.42                            | 0.14       | 0.08               | 0.011167 | Yes                                  | Yes                                                  |
| 212767_at   | 92170  | MTG1   | 10  | mitochondrial GTPase 1 homolog (S.<br>cerevisiae)                               | Yes                        | 0.79                            | 0.35       | 0.33               | 0.015415 | Yes                                  | Yes                                                  |
| 202197_at   | 8897   | MTMR3  | 22  | myotubularin related protein 3                                                  | Yes                        | 0.95                            | 0.79       | 0.53               | 0.005252 | Yes                                  | Yes                                                  |
| 219796_s_at | 53841  | MUPCDH | 11  | mucin-like protocadherin                                                        | NA                         | 0.89                            | 0.63       | 0.45               | 0.009251 | NA                                   | NA                                                   |
| 203027_s_at | 4597   | MVD    | 16  | mevalonate (diphospho) decarboxylase                                            | Yes                        | 0.32                            | 0.02       | 0.03               | 0.008413 | Yes                                  | Yes                                                  |
| 204056_s_at | 4598   | MVK    | 12  | mevalonate kinase                                                               | Yes                        | 0.47                            | 0.18       | 0.15               | 0.034406 | Yes                                  | Yes                                                  |
| 201959_s_at | 23077  | MYCBP2 | 13  | MYC binding protein 2                                                           | Yes                        | 0.53                            | 0.60       | 0.23               | 0.032471 | Yes                                  | Yes                                                  |
| 205144_at   | 4636   | MYL5   | 4   | myosin, light chain 5, regulatory                                               | Yes                        | 0.42                            | 0.00       | 0.05               | 0.001882 | No                                   | Yes                                                  |

Supplemental Table I

| ProbeSet    | Entrez | Symbol | Chr | Gene name   | Gene in<br>NCBI<br>dataset | Proportion                      |                                             |                                     | q-value  | CpG<br>islands<br>(Takai &<br>Jones) | CpG<br>islands<br>(Gardiner-<br>Garden &<br>Frommer) |
|-------------|--------|--------|-----|-------------|----------------------------|---------------------------------|---------------------------------------------|-------------------------------------|----------|--------------------------------------|------------------------------------------------------|
|             |        |        |     |             |                            | Proportion<br>Present<br>Normal | Proportion<br>Present<br>Pre-<br>neoplastic | Proportion<br>Present<br>Neoplastic |          |                                      |                                                      |
| 201976_s_at | 4651   | MYO10  | 5   | myosin X    | Yes                        | 1.00                            | 1.00                                        | 0.88                                | 0.018759 | Yes                                  | Yes                                                  |
| 215074_at   | 4430   | MYO1B  | 2   | myosin IB   | Yes                        | 0.95                            | 0.49                                        | 0.50                                | 0.016151 | Yes                                  | Yes                                                  |
| 203215_s_at | 4646   | MYO6   | 6   | myosin VI   | Yes                        | 0.37                            | 0.67                                        | 0.18                                | 0.049009 | Yes                                  | Yes                                                  |
| 33197_at    | 4647   | MYO7A  | 11  | myosin VIIA | Yes                        | 1.00                            | 0.70                                        | 0.63                                | 0.014875 | No                                   | No                                                   |
| 207588_at   | NA     | NA     | NA  | NA          | NA                         | 0.16                            | 0.00                                        | 0.03                                | 0.040429 | NA                                   | NA                                                   |
| 207730_x_at | NA     | NA     | NA  | NA          | NA                         | 0.95                            | 0.98                                        | 0.80                                | 0.037924 | NA                                   | NA                                                   |
| 210848_at   | NA     | NA     | NA  | NA          | NA                         | 0.21                            | 0.07                                        | 0.00                                | 0.024182 | NA                                   | NA                                                   |
| 212528_at   | NA     | NA     | NA  | NA          | NA                         | 1.00                            | 0.89                                        | 0.70                                | 0.010364 | NA                                   | NA                                                   |
| 213396_s_at | NA     | NA     | NA  | NA          | NA                         | 0.63                            | 0.84                                        | 0.38                                | 0.007122 | NA                                   | NA                                                   |
| 213403_at   | NA     | NA     | NA  | NA          | NA                         | 0.58                            | 0.00                                        | 0.10                                | 0.000988 | NA                                   | NA                                                   |
| 213657_s_at | NA     | NA     | NA  | NA          | NA                         | 0.95                            | 0.19                                        | 0.30                                | 0.000816 | NA                                   | NA                                                   |
| 213813_x_at | NA     | NA     | NA  | NA          | NA                         | 1.00                            | 1.00                                        | 0.78                                | 0.000982 | NA                                   | NA                                                   |
| 213848_at   | NA     | NA     | NA  | NA          | NA                         | 0.84                            | 0.46                                        | 0.25                                | 0.000413 | NA                                   | NA                                                   |
| 214967_at   | NA     | NA     | NA  | NA          | NA                         | 0.42                            | 0.49                                        | 0.13                                | 0.01344  | NA                                   | NA                                                   |
| 215185_at   | NA     | NA     | NA  | NA          | NA                         | 0.47                            | 0.09                                        | 0.10                                | 0.00791  | NA                                   | NA                                                   |
| 215221_at   | NA     | NA     | NA  | NA          | NA                         | 0.95                            | 0.81                                        | 0.53                                | 0.000401 | NA                                   | NA                                                   |
| 215284_at   | NA     | NA     | NA  | NA          | NA                         | 0.74                            | 0.75                                        | 0.43                                | 0.016456 | NA                                   | NA                                                   |
| 215385_at   | NA     | NA     | NA  | NA          | NA                         | 0.84                            | 0.82                                        | 0.50                                | 0.004722 | NA                                   | NA                                                   |
| 215439_x_at | NA     | NA     | NA  | NA          | NA                         | 0.63                            | 0.65                                        | 0.25                                | 0.024747 | NA                                   | NA                                                   |
| 215578_at   | NA     | NA     | NA  | NA          | NA                         | 1.00                            | 0.91                                        | 0.50                                | 3.63E-05 | NA                                   | NA                                                   |
| 215604_x_at | NA     | NA     | NA  | NA          | NA                         | 1.00                            | 0.93                                        | 0.83                                | 0.027655 | NA                                   | NA                                                   |
| 215651_at   | NA     | NA     | NA  | NA          | NA                         | 0.47                            | 0.44                                        | 0.10                                | 0.007865 | NA                                   | NA                                                   |
| 215755_at   | NA     | NA     | NA  | NA          | NA                         | 0.32                            | 0.11                                        | 0.05                                | 0.023754 | NA                                   | NA                                                   |
| 215768_at   | NA     | NA     | NA  | NA          | NA                         | 1.00                            | 0.88                                        | 0.73                                | 0.013199 | NA                                   | NA                                                   |
| 216006_at   | NA     | NA     | NA  | NA          | NA                         | 0.79                            | 0.72                                        | 0.43                                | 0.009611 | NA                                   | NA                                                   |
| 216065_at   | NA     | NA     | NA  | NA          | NA                         | 0.53                            | 0.28                                        | 0.15                                | 0.023984 | NA                                   | NA                                                   |
| 216101_at   | NA     | NA     | NA  | NA          | NA                         | 0.32                            | 0.28                                        | 0.08                                | 0.047487 | NA                                   | NA                                                   |
| 216121_at   | NA     | NA     | NA  | NA          | NA                         | 0.79                            | 0.04                                        | 0.08                                | 1.38E-05 | NA                                   | NA                                                   |
| 216152_at   | NA     | NA     | NA  | NA          | NA                         | 0.26                            | 0.05                                        | 0.03                                | 0.029008 | NA                                   | NA                                                   |
| 216173_at   | NA     | NA     | NA  | NA          | NA                         | 0.84                            | 0.54                                        | 0.50                                | 0.040705 | NA                                   | NA                                                   |
| 216259_at   | NA     | NA     | NA  | NA          | NA                         | 0.58                            | 0.26                                        | 0.13                                | 0.008252 | NA                                   | NA                                                   |
| 216376_x_at | NA     | NA     | NA  | NA          | NA                         | 0.58                            | 0.07                                        | 0.03                                | 0.000202 | NA                                   | NA                                                   |
| 216499_at   | NA     | NA     | NA  | NA          | NA                         | 0.84                            | 0.63                                        | 0.48                                | 0.029008 | NA                                   | NA                                                   |
| 216628_at   | NA     | NA     | NA  | NA          | NA                         | 0.74                            | 0.61                                        | 0.35                                | 0.003928 | NA                                   | NA                                                   |
| 216813_at   | NA     | NA     | NA  | NA          | NA                         | 1.00                            | 1.00                                        | 0.70                                | 0.000201 | NA                                   | NA                                                   |
| 216859_x_at | NA     | NA     | NA  | NA          | NA                         | 0.84                            | 0.89                                        | 0.63                                | 0.044592 | NA                                   | NA                                                   |
| 217052_x_at | NA     | NA     | NA  | NA          | NA                         | 1.00                            | 0.70                                        | 0.60                                | 0.013226 | NA                                   | NA                                                   |
| 217166_at   | NA     | NA     | NA  | NA          | NA                         | 0.63                            | 0.18                                        | 0.15                                | 0.003182 | NA                                   | NA                                                   |
| 217416_x_at | NA     | NA     | NA  | NA          | NA                         | 0.37                            | 0.47                                        | 0.13                                | 0.041112 | NA                                   | NA                                                   |
| 217482_at   | NA     | NA     | NA  | NA          | NA                         | 1.00                            | 0.93                                        | 0.60                                | 2.71E-05 | NA                                   | NA                                                   |

Supplemental Table I

| ProbeSet    | Entrez | Symbol   | Chr | Gene name                                        | Gene in<br>NCBI<br>dataset | Proportion                      |                                             |                                     | q-value  | CpG<br>islands<br>(Takai &<br>Jones) | CpG<br>islands<br>(Gardiner-<br>Garden &<br>Frommer) |
|-------------|--------|----------|-----|--------------------------------------------------|----------------------------|---------------------------------|---------------------------------------------|-------------------------------------|----------|--------------------------------------|------------------------------------------------------|
|             |        |          |     |                                                  |                            | Proportion<br>Present<br>Normal | Proportion<br>Present<br>Pre-<br>neoplastic | Proportion<br>Present<br>Neoplastic |          |                                      |                                                      |
| 217519_at   | NA     | NA       | NA  | NA                                               | NA                         | 0.74                            | 0.47                                        | 0.18                                | 0.000688 | NA                                   | NA                                                   |
| 217554_at   | NA     | NA       | NA  | NA                                               | NA                         | 0.79                            | 0.70                                        | 0.25                                | 4.21E-05 | NA                                   | NA                                                   |
| 217625_x_at | NA     | NA       | NA  | NA                                               | NA                         | 0.84                            | 0.58                                        | 0.33                                | 0.000379 | NA                                   | NA                                                   |
| 217637_at   | NA     | NA       | NA  | NA                                               | NA                         | 0.47                            | 0.23                                        | 0.13                                | 0.01473  | NA                                   | NA                                                   |
| 217647_at   | NA     | NA       | NA  | NA                                               | NA                         | 0.79                            | 0.11                                        | 0.05                                | 7.77E-07 | NA                                   | NA                                                   |
| 217653_x_at | NA     | NA       | NA  | NA                                               | NA                         | 1.00                            | 0.84                                        | 0.60                                | 0.000738 | NA                                   | NA                                                   |
| 217666_at   | NA     | NA       | NA  | NA                                               | NA                         | 0.21                            | 0.00                                        | 0.03                                | 0.024723 | NA                                   | NA                                                   |
| 217676_at   | NA     | NA       | NA  | NA                                               | NA                         | 0.21                            | 0.00                                        | 0.03                                | 0.038536 | NA                                   | NA                                                   |
| 217682_at   | NA     | NA       | NA  | NA                                               | NA                         | 0.74                            | 0.68                                        | 0.28                                | 0.005514 | NA                                   | NA                                                   |
| 217697_at   | NA     | NA       | NA  | NA                                               | NA                         | 0.16                            | 0.09                                        | 0.00                                | 0.044696 | NA                                   | NA                                                   |
| 217703_x_at | NA     | NA       | NA  | NA                                               | NA                         | 1.00                            | 0.88                                        | 0.58                                | 0.000743 | NA                                   | NA                                                   |
| 220855_at   | NA     | NA       | NA  | NA                                               | NA                         | 0.26                            | 0.00                                        | 0.03                                | 0.01014  | NA                                   | NA                                                   |
| 220898_at   | NA     | NA       | NA  | NA                                               | NA                         | 0.74                            | 0.58                                        | 0.38                                | 0.031892 | NA                                   | NA                                                   |
| 221155_x_at | NA     | NA       | NA  | NA                                               | NA                         | 0.53                            | 0.16                                        | 0.08                                | 0.000854 | NA                                   | NA                                                   |
| 221642_at   | NA     | NA       | NA  | NA                                               | NA                         | 0.32                            | 0.04                                        | 0.03                                | 0.002462 | NA                                   | NA                                                   |
| 222213_x_at | NA     | NA       | NA  | NA                                               | NA                         | 0.42                            | 0.19                                        | 0.08                                | 0.017839 | NA                                   | NA                                                   |
| 222313_at   | NA     | NA       | NA  | NA                                               | NA                         | 0.79                            | 0.84                                        | 0.48                                | 0.002577 | NA                                   | NA                                                   |
| 222330_at   | NA     | NA       | NA  | NA                                               | NA                         | 0.84                            | 0.86                                        | 0.63                                | 0.020593 | NA                                   | NA                                                   |
| 81811_at    | NA     | NA       | NA  | NA                                               | NA                         | 0.63                            | 0.40                                        | 0.28                                | 0.031576 | NA                                   | NA                                                   |
|             |        |          |     | NGFI-A binding protein 2 (EGR1 binding           |                            |                                 |                                             |                                     |          |                                      |                                                      |
| 212803_at   | 4665   | NAB2     | 12  | protein 2)                                       | Yes                        | 0.42                            | 0.23                                        | 0.08                                | 0.006226 | Yes                                  | Yes                                                  |
| 213607_x_at | 65220  | NADK     | 1   | NAD kinase                                       | Yes                        | 1.00                            | 0.65                                        | 0.60                                | 0.016318 | Yes                                  | Yes                                                  |
| 209556_at   | 23154  | NCDN     | 1   | neurochondrin                                    | Yes                        | 0.26                            | 0.05                                        | 0.00                                | 0.012678 | Yes                                  | Yes                                                  |
| 217465_at   | 10787  | NCKAP1   | 2   | NCK-associated protein 1                         | Yes                        | 1.00                            | 0.95                                        | 0.80                                | 0.016805 | Yes                                  | Yes                                                  |
| 217045_x_at | 9436   | NCR2     | 6   | natural cytotoxicity triggering receptor 2       | Yes                        | 0.68                            | 0.28                                        | 0.33                                | 0.046153 | No                                   | No                                                   |
| 206022_at   | 4693   | NDP      | X   | Norrie disease (pseudoglioma)                    | Yes                        | 0.63                            | 0.05                                        | 0.18                                | 0.010684 | No                                   | No                                                   |
|             |        |          |     | NADH dehydrogenase (ubiquinone) 1 alpha          |                            |                                 |                                             |                                     |          |                                      |                                                      |
| 214095_at   | 56901  | NDUFA4L2 | 12  | subcomplex, 4-like 2                             | NA                         | 0.89                            | 0.44                                        | 0.38                                | 0.002051 | NA                                   | NA                                                   |
|             |        |          |     | NIMA (never in mitosis gene a)-related kinase    |                            |                                 |                                             |                                     |          |                                      |                                                      |
| 213328_at   | 4750   | NEK1     | 4   | 1                                                | Yes                        | 0.79                            | 0.84                                        | 0.58                                | 0.0182   | Yes                                  | Yes                                                  |
| 218915_at   | 4771   | NF2      | 22  | neurofibromin 2 (merlin)                         | Yes                        | 0.37                            | 0.19                                        | 0.05                                | 0.008809 | Yes                                  | Yes                                                  |
|             |        |          |     | nuclear factor of activated T-cells 5, tonicity- |                            |                                 |                                             |                                     |          |                                      |                                                      |
| 208003_s_at | 10725  | NFAT5    | 16  | responsive                                       | Yes                        | 0.95                            | 0.95                                        | 0.63                                | 0.001    | Yes                                  | Yes                                                  |
|             |        |          |     | nuclear factor of activated T-cells,             |                            |                                 |                                             |                                     |          |                                      |                                                      |
| 210555_s_at | 4775   | NFATC3   | 16  | cytoplasmic, calcineurin-dependent 3             | Yes                        | 1.00                            | 1.00                                        | 0.88                                | 0.018759 | Yes                                  | Yes                                                  |
|             |        |          |     | nuclear factor of activated T-cells,             |                            |                                 |                                             |                                     |          |                                      |                                                      |
| 210556_at   | 4775   | NFATC3   | 16  | cytoplasmic, calcineurin-dependent 3             | Yes                        | 0.84                            | 0.77                                        | 0.43                                | 0.00552  | Yes                                  | Yes                                                  |
| 211466_at   | 4781   | NFIB     | 9   | nuclear factor I/B                               | Yes                        | 0.63                            | 0.68                                        | 0.30                                | 0.005397 | Yes                                  | Yes                                                  |
|             |        |          |     | nuclear factor I/C (CCAAT-binding                |                            |                                 |                                             |                                     |          |                                      |                                                      |
| 213298_at   | 4782   | NFIC     | 19  | transcription factor)                            | Yes                        | 0.74                            | 0.60                                        | 0.33                                | 0.005097 | Yes                                  | Yes                                                  |

Supplemental Table I

| ProbeSet    | Entrez | Symbol  | Chr | Gene name                                                                            | Gene in<br>NCBI<br>dataset | Proportion                      |                                             |                                     | q-value  | CpG<br>islands<br>(Takai &<br>Jones) | CpG<br>islands<br>(Gardiner-<br>Garden &<br>Frommer) |
|-------------|--------|---------|-----|--------------------------------------------------------------------------------------|----------------------------|---------------------------------|---------------------------------------------|-------------------------------------|----------|--------------------------------------|------------------------------------------------------|
|             |        |         |     |                                                                                      |                            | Proportion<br>Present<br>Normal | Proportion<br>Present<br>Pre-<br>neoplastic | Proportion<br>Present<br>Neoplastic |          |                                      |                                                      |
| 215525_at   | 79840  | NHEJ1   | 2   | nonhomologous end-joining factor 1<br>non-metastatic cells 6, protein expressed in   | Yes                        | 0.63                            | 0.21                                        | 0.18                                | 0.008252 | Yes                                  | Yes                                                  |
| 205851_at   | 10201  | NME6    | 3   | (nucleoside-diphosphate kinase)<br>Notch homolog 1, translocation-associated         | Yes                        | 1.00                            | 0.81                                        | 0.73                                | 0.04171  | Yes                                  | Yes                                                  |
| 218902_at   | 4851   | NOTCH1  | 9   | (Drosophila)                                                                         | Yes                        | 0.53                            | 0.51                                        | 0.28                                | 0.043688 | Yes                                  | Yes                                                  |
| 213462_at   | 4862   | NPAS2   | 2   | neuronal PAS domain protein 2<br>NPC1 (Niemann-Pick disease, type C1, gene)-         | Yes                        | 0.26                            | 0.04                                        | 0.03                                | 0.028196 | Yes                                  | Yes                                                  |
| 220106_at   | 29881  | NPC1L1  | 7   | like 1                                                                               | Yes                        | 1.00                            | 0.58                                        | 0.43                                | 0.003592 | No                                   | No                                                   |
| 89476_r_at  | 79716  | NPEPL1  | 20  | aminopeptidase-like 1                                                                | Yes                        | 0.53                            | 0.37                                        | 0.23                                | 0.020098 | Yes                                  | Yes                                                  |
| 205440_s_at | 4886   | NPY1R   | 4   | neuropeptide Y receptor Y1<br>nuclear receptor subfamily 1, group I, member          | Yes                        | 0.68                            | 0.82                                        | 0.40                                | 0.018559 | No                                   | Yes                                                  |
| 207203_s_at | 8856   | NR1I2   | 3   | 2<br>nuclear receptor subfamily 2, group E,                                          | Yes                        | 0.21                            | 0.04                                        | 0.03                                | 0.018865 | No                                   | No                                                   |
| 208388_at   | 10002  | NR2E3   | 15  | member 3<br>nuclear receptor subfamily 2, group F,                                   | Yes                        | 0.16                            | 0.02                                        | 0.00                                | 0.040429 | No                                   | No                                                   |
| 209262_s_at | 2063   | NR2F6   | 19  | member 6<br>nuclear receptor subfamily 3, group C,                                   | Yes                        | 0.89                            | 0.56                                        | 0.40                                | 0.005448 | Yes                                  | Yes                                                  |
| 205259_at   | 4306   | NR3C2   | 4   | member 2                                                                             | Yes                        | 1.00                            | 0.91                                        | 0.78                                | 0.020537 | Yes                                  | Yes                                                  |
| 211279_at   | 4899   | NRF1    | 7   | nuclear respiratory factor 1                                                         | Yes                        | 0.58                            | 0.04                                        | 0.20                                | 0.037141 | Yes                                  | Yes                                                  |
| 210683_at   | 4902   | NRTN    | 19  | neurturin<br>nuclear receptor binding SET domain protein                             | NA                         | 0.42                            | 0.02                                        | 0.05                                | 0.00036  | NA                                   | NA                                                   |
| 219084_at   | 64324  | NSD1    | 5   | 1                                                                                    | Yes                        | 0.79                            | 0.21                                        | 0.20                                | 0.002635 | Yes                                  | Yes                                                  |
| 222128_at   | 221078 | NSUN6   | 10  | NOL1/NOP2/Sun domain family, member 6<br>nucleotide binding protein 2 (MinD homolog, | Yes                        | 0.79                            | 0.60                                        | 0.38                                | 0.012441 | Yes                                  | Yes                                                  |
| 218227_at   | 10101  | NUBP2   | 16  | E. coli)<br>nudix (nucleoside diphosphate linked moiety                              | Yes                        | 0.79                            | 0.54                                        | 0.38                                | 0.007906 | Yes                                  | Yes                                                  |
| 221579_s_at | 11165  | NUDT3   | 6   | X)-type motif 3<br>nuclear fragile X mental retardation protein                      | Yes                        | 1.00                            | 0.82                                        | 0.73                                | 0.03883  | Yes                                  | Yes                                                  |
| 205134_s_at | 26747  | NUFIP1  | 13  | interacting protein 1                                                                | Yes                        | 0.79                            | 0.75                                        | 0.43                                | 0.007854 | Yes                                  | Yes                                                  |
| 211512_s_at | 11054  | OGFR    | 20  | opioid growth factor receptor<br>olfactory receptor, family 10, subfamily H,         | Yes                        | 0.79                            | 0.19                                        | 0.30                                | 0.016548 | Yes                                  | Yes                                                  |
| 208520_at   | 26532  | OR10H3  | 19  | member 3<br>olfactory receptor, family 12, subfamily D,                              | Yes                        | 0.79                            | 0.30                                        | 0.35                                | 0.042684 | No                                   | No                                                   |
| 221431_s_at | 81797  | OR12D3  | 6   | member 3<br>olfactory receptor, family 1, subfamily F,                               | Yes                        | 0.16                            | 0.00                                        | 0.00                                | 0.020098 | No                                   | No                                                   |
| 221402_at   | 4992   | OR1F1   | 16  | member 1<br>olfactory receptor, family 7, subfamily E,                               | Yes                        | 0.79                            | 0.18                                        | 0.25                                | 0.001918 | No                                   | No                                                   |
| 216698_x_at | 26628  | OR7E47P | 12  | member 47 pseudogene<br>ORAI calcium release-activated calcium                       | Yes                        | 0.79                            | 0.26                                        | 0.33                                | 0.043063 | No                                   | Yes                                                  |
| 218811_at   | 80228  | Orai2   | 7   | modulator 2                                                                          | NA                         | 0.21                            | 0.00                                        | 0.00                                | 0.006175 | NA                                   | NA                                                   |



Supplemental Table I

| ProbeSet    | Entrez | Symbol  | Chr | Gene name                                                                                                  | Gene in<br>NCBI<br>dataset | Proportion<br>Present<br>Normal | Proportion<br>Present<br>Pre-<br>neoplastic | Proportion<br>Present<br>Neoplastic | q-value  | CpG<br>islands<br>(Takai &<br>Jones) | CpG<br>islands<br>(Gardiner-<br>Garden &<br>Frommer) |
|-------------|--------|---------|-----|------------------------------------------------------------------------------------------------------------|----------------------------|---------------------------------|---------------------------------------------|-------------------------------------|----------|--------------------------------------|------------------------------------------------------|
| 209485_s_at | 114876 | OSBPL1A | 18  | oxysterol binding protein-like 1A                                                                          | Yes                        | 0.89                            | 0.88                                        | 0.50                                | 0.001171 | Yes                                  | Yes                                                  |
| 209450_at   | 55644  | OSGEP   | 14  | O-sialoglycoprotein endopeptidase                                                                          | Yes                        | 0.84                            | 0.37                                        | 0.20                                | 0.000234 | Yes                                  | Yes                                                  |
| 220669_at   | 54726  | OTUD4   | 4   | OTU domain containing 4                                                                                    | Yes                        | 0.58                            | 0.11                                        | 0.18                                | 0.024044 | No                                   | No                                                   |
| 214664_at   | 10606  | PAICS   | 4   | phosphoribosylaminoimidazole carboxylase,<br>phosphoribosylaminoimidazole<br>succinocarboxamide synthetase | Yes                        | 0.37                            | 0.02                                        | 0.05                                | 0.003991 | Yes                                  | Yes                                                  |
| 218886_at   | 55003  | PAK1IP1 | 6   | PAK1 interacting protein 1                                                                                 | Yes                        | 0.95                            | 0.33                                        | 0.43                                | 0.011167 | Yes                                  | Yes                                                  |
| 203059_s_at | 9060   | PAPSS2  | 10  | 3'-phosphoadenosine 5'-phosphosulfate<br>synthase 2                                                        | Yes                        | 1.00                            | 0.68                                        | 0.68                                | 0.043588 | Yes                                  | Yes                                                  |
| 210094_s_at | 56288  | PARD3   | 10  | par-3 partitioning defective 3 homolog (C.<br>elegans)                                                     | Yes                        | 0.58                            | 0.74                                        | 0.23                                | 0.007638 | Yes                                  | Yes                                                  |
| 205245_at   | 50855  | PARD6A  | 16  | par-6 partitioning defective 6 homolog alpha<br>(C. elegans)                                               | Yes                        | 0.21                            | 0.04                                        | 0.00                                | 0.018865 | Yes                                  | Yes                                                  |
| 204476_s_at | 5091   | PC      | 11  | pyruvate carboxylase                                                                                       | Yes                        | 1.00                            | 0.42                                        | 0.13                                | 1.55E-07 | No                                   | No                                                   |
| 220186_s_at | 54825  | PCDH24  | 5   | protocadherin 24                                                                                           | NA                         | 1.00                            | 0.93                                        | 0.75                                | 0.008973 | NA                                   | NA                                                   |
| 219737_s_at | 5101   | PCDH9   | 13  | protocadherin 9                                                                                            | Yes                        | 0.79                            | 0.96                                        | 0.45                                | 0.000724 | Yes                                  | Yes                                                  |
| 221303_at   | 29930  | PCDHB1  | 5   | protocadherin beta 1                                                                                       | Yes                        | 0.37                            | 0.11                                        | 0.03                                | 0.005558 | Yes                                  | Yes                                                  |
| 215836_s_at | 5098   | PCDHGC3 | 5   | protocadherin gamma subfamily C, 3                                                                         | NA                         | 0.74                            | 0.56                                        | 0.38                                | 0.02569  | NA                                   | NA                                                   |
| 209997_x_at | 5108   | PCM1    | 8   | pericentriolar material 1                                                                                  | Yes                        | 0.63                            | 0.44                                        | 0.30                                | 0.034017 | Yes                                  | Yes                                                  |
| 215175_at   | 22990  | PCNX    | 14  | pecanex homolog (Drosophila)                                                                               | Yes                        | 1.00                            | 0.91                                        | 0.80                                | 0.039909 | Yes                                  | Yes                                                  |
| 210553_x_at | 5046   | PCSK6   | 15  | proprotein convertase subtilisin/kexin type 6                                                              | Yes                        | 0.37                            | 0.30                                        | 0.10                                | 0.041285 | Yes                                  | Yes                                                  |
| 211262_at   | 5046   | PCSK6   | 15  | proprotein convertase subtilisin/kexin type 6                                                              | Yes                        | 0.32                            | 0.00                                        | 0.00                                | 0.000727 | Yes                                  | Yes                                                  |
| 209700_x_at | 9659   | PDE4DIP | 1   | phosphodiesterase 4D interacting protein                                                                   | Yes                        | 0.79                            | 0.28                                        | 0.30                                | 0.011558 | Yes                                  | Yes                                                  |
| 213228_at   | 8622   | PDE8B   | 5   | phosphodiesterase 8B                                                                                       | Yes                        | 0.53                            | 0.53                                        | 0.18                                | 0.008384 | Yes                                  | Yes                                                  |
| 206347_at   | 5165   | PDK3    | X   | pyruvate dehydrogenase kinase, isozyme 3                                                                   | Yes                        | 0.16                            | 0.02                                        | 0.00                                | 0.028496 | Yes                                  | Yes                                                  |
| 221957_at   | 5165   | PDK3    | X   | pyruvate dehydrogenase kinase, isozyme 3                                                                   | Yes                        | 0.68                            | 0.33                                        | 0.25                                | 0.012671 | Yes                                  | Yes                                                  |
| 204524_at   | 5170   | PDPK1   | 16  | 3-phosphoinositide dependent protein kinase-<br>1                                                          | Yes                        | 0.63                            | 0.51                                        | 0.10                                | 9.97E-05 | Yes                                  | Yes                                                  |
| 32029_at    | 5170   | PDPK1   | 16  | 3-phosphoinositide dependent protein kinase-<br>1                                                          | Yes                        | 0.42                            | 0.18                                        | 0.08                                | 0.009888 | Yes                                  | Yes                                                  |
| 209242_at   | 5178   | PEG3    | 19  | paternally expressed 3                                                                                     | NA                         | 1.00                            | 0.98                                        | 0.83                                | 0.011807 | NA                                   | NA                                                   |
| 209243_s_at | 5178   | PEG3    | 19  | paternally expressed 3                                                                                     | NA                         | 0.95                            | 0.70                                        | 0.60                                | 0.023707 | NA                                   | NA                                                   |
| 202861_at   | 5187   | PER1    | 17  | period homolog 1 (Drosophila)                                                                              | Yes                        | 0.63                            | 0.82                                        | 0.38                                | 0.018759 | Yes                                  | Yes                                                  |
| 222029_x_at | 10471  | PFDN6   | 6   | prefoldin subunit 6                                                                                        | Yes                        | 0.79                            | 0.61                                        | 0.48                                | 0.03841  | Yes                                  | Yes                                                  |
| 220944_at   | 57115  | PGLYRP4 | 1   | peptidoglycan recognition protein 4                                                                        | Yes                        | 0.95                            | 0.30                                        | 0.48                                | 0.029008 | No                                   | No                                                   |
| 209423_s_at | 51230  | PHF20   | 20  | PHD finger protein 20                                                                                      | Yes                        | 0.89                            | 0.21                                        | 0.35                                | 0.011664 | No                                   | Yes                                                  |
| 219606_at   | 51105  | PHF20L1 | 8   | PHD finger protein 20-like 1                                                                               | Yes                        | 0.42                            | 0.25                                        | 0.10                                | 0.045478 | Yes                                  | Yes                                                  |

Supplemental Table I

| ProbeSet    | Entrez | Symbol   | Chr | Gene name                                                                                           | Gene in<br>NCBI<br>dataset | Proportion<br>Present<br>Normal | Proportion<br>Present<br>Pre-<br>neoplastic | Proportion<br>Present<br>Neoplastic | q-value  | CpG<br>islands<br>(Takai &<br>Jones) | CpG<br>islands<br>(Gardiner-<br>Garden &<br>Frommer) |
|-------------|--------|----------|-----|-----------------------------------------------------------------------------------------------------|----------------------------|---------------------------------|---------------------------------------------|-------------------------------------|----------|--------------------------------------|------------------------------------------------------|
| 214442_s_at | 9063   | PIAS2    | 18  | protein inhibitor of activated STAT, 2<br>phosphoinositide-3-kinase, catalytic, beta                | Yes                        | 0.16                            | 0.05                                        | 0.00                                | 0.042026 | Yes                                  | Yes                                                  |
| 217620_s_at | 5291   | PIK3CB   | 3   | polypeptide<br>phosphatidylinositol-5-phosphate 4-kinase,                                           | Yes                        | 0.68                            | 0.37                                        | 0.30                                | 0.031576 | No                                   | No                                                   |
| 218942_at   | 79837  | PIP4K2C  | 12  | type II, gamma                                                                                      | NA                         | 0.68                            | 0.63                                        | 0.30                                | 0.015629 | NA                                   | NA                                                   |
| 218644_at   | 26499  | PLEK2    | 14  | pleckstrin 2<br>pleckstrin homology domain containing, family                                       | Yes                        | 0.89                            | 0.75                                        | 0.58                                | 0.008252 | Yes                                  | Yes                                                  |
| 201411_s_at | 55041  | PLEKHB2  | 2   | B (evectins) member 2<br>pleckstrin homology domain containing, family                              | Yes                        | 0.89                            | 0.74                                        | 0.55                                | 0.014623 | Yes                                  | Yes                                                  |
| 212717_at   | 9842   | PLEKHM1  | 17  | M (with RUN domain) member 1                                                                        | Yes                        | 0.63                            | 0.25                                        | 0.08                                | 0.000334 | Yes                                  | Yes                                                  |
| 211014_s_at | 5371   | PML      | 15  | promyelocytic leukemia                                                                              | Yes                        | 0.26                            | 0.18                                        | 0.03                                | 0.03184  | No                                   | Yes                                                  |
| 203201_at   | 5373   | PMM2     | 16  | phosphomannomutase 2                                                                                | Yes                        | 0.95                            | 0.74                                        | 0.48                                | 0.0013   | Yes                                  | Yes                                                  |
| 217343_at   | 5408   | PNLIPRP2 | 10  | pancreatic lipase-related protein 2<br>patatin-like phospholipase domain containing                 | Yes                        | 0.16                            | 0.02                                        | 0.00                                | 0.02755  | No                                   | Yes                                                  |
| 220675_s_at | 80339  | PNPLA3   | 22  | 3                                                                                                   | Yes                        | 0.53                            | 0.56                                        | 0.18                                | 0.01336  | Yes                                  | Yes                                                  |
| 209578_s_at | 23275  | POFUT2   | 21  | protein O-fucosyltransferase 2<br>polymerase (DNA directed), delta 2,                               | Yes                        | 0.79                            | 0.82                                        | 0.43                                | 0.00552  | Yes                                  | Yes                                                  |
| 201115_at   | 5425   | POLD2    | 7   | regulatory subunit 50kDa                                                                            | Yes                        | 1.00                            | 0.46                                        | 0.58                                | 0.030024 | Yes                                  | Yes                                                  |
| 216175_at   | 5425   | POLD2    | 7   | polymerase (DNA directed), delta 2                                                                  | Yes                        | 0.79                            | 0.18                                        | 0.10                                | 1.79E-05 | Yes                                  | Yes                                                  |
| 216026_s_at | 5426   | POLE     | 12  | polymerase (DNA directed), epsilon                                                                  | Yes                        | 0.47                            | 0.14                                        | 0.10                                | 0.018123 | Yes                                  | Yes                                                  |
| 220113_x_at | 84172  | POLR1B   | 2   | polymerase (RNA) I polypeptide B, 128kDa<br>polymerase (RNA) II (DNA directed)                      | Yes                        | 1.00                            | 0.91                                        | 0.75                                | 0.015132 | Yes                                  | Yes                                                  |
| 202725_at   | 5430   | POLR2A   | 17  | polypeptide A, 220kDa<br>polymerase (RNA) II (DNA directed)                                         | Yes                        | 0.58                            | 0.63                                        | 0.23                                | 0.014261 | Yes                                  | Yes                                                  |
| 217610_at   | 84820  | POLR2J4  | 7   | polypeptide J4, pseudogene<br>polymerase (RNA) II (DNA directed)                                    | NA                         | 0.37                            | 0.04                                        | 0.00                                | 0.000542 | NA                                   | NA                                                   |
| 222208_s_at | 84820  | POLR2J4  | 7   | polypeptide J4, pseudogene                                                                          | NA                         | 0.47                            | 0.39                                        | 0.13                                | 0.018865 | NA                                   | NA                                                   |
| 212178_s_at | 9883   | POM121   | 7   | POM121 membrane glycoprotein (rat)                                                                  | Yes                        | 1.00                            | 0.98                                        | 0.83                                | 0.017672 | Yes                                  | Yes                                                  |
| 206870_at   | 5465   | PPARA    | 22  | alpha<br>peroxisome proliferator-activated receptor                                                 | Yes                        | 0.63                            | 0.05                                        | 0.10                                | 0.000906 | Yes                                  | Yes                                                  |
| 208044_s_at | 5467   | PPARD    | 6   | delta<br>peroxisome proliferator-activated receptor                                                 | Yes                        | 0.42                            | 0.12                                        | 0.10                                | 0.024823 | Yes                                  | Yes                                                  |
| 37152_at    | 5467   | PPARD    | 6   | delta<br>protein tyrosine phosphatase, receptor type, f<br>polypeptide (PTPRF), interacting protein | Yes                        | 0.95                            | 0.68                                        | 0.38                                | 0.000169 | Yes                                  | Yes                                                  |
| 210236_at   | 8500   | PPFIA1   | 11  | (liprin), alpha 1<br>PTPRF interacting protein, binding protein 1                                   | Yes                        | 0.79                            | 0.58                                        | 0.43                                | 0.015819 | Yes                                  | Yes                                                  |
| 214375_at   | 8496   | PPFIBP1  | 12  | (liprin beta 1)                                                                                     | Yes                        | 0.63                            | 0.63                                        | 0.30                                | 0.008793 | Yes                                  | Yes                                                  |

Supplemental Table I

| ProbeSet    | Entrez | Symbol  | Chr | Gene name                                                                                           | Gene in<br>NCBI<br>dataset | Proportion<br>Present<br>Normal | Proportion<br>Present<br>Pre-<br>neoplastic | Proportion<br>Present<br>Neoplastic | q-value  | CpG<br>islands<br>(Takai &<br>Jones) | CpG<br>islands<br>(Gardiner-<br>Garden &<br>Frommer) |
|-------------|--------|---------|-----|-----------------------------------------------------------------------------------------------------|----------------------------|---------------------------------|---------------------------------------------|-------------------------------------|----------|--------------------------------------|------------------------------------------------------|
|             |        |         |     | PTPRF interacting protein, binding protein 2                                                        |                            |                                 |                                             |                                     |          |                                      |                                                      |
| 215959_at   | 8495   | PPFIBP2 | 11  | (liprin beta 2)                                                                                     | Yes                        | 0.26                            | 0.07                                        | 0.03                                | 0.032847 | Yes                                  | Yes                                                  |
| 221615_at   | 10450  | PPIE    | 1   | peptidylprolyl isomerase E (cyclophilin E)                                                          | Yes                        | 0.53                            | 0.33                                        | 0.18                                | 0.026082 | Yes                                  | Yes                                                  |
| 203407_at   | 5493   | PPL     | 16  | periplakin                                                                                          | Yes                        | 0.84                            | 0.63                                        | 0.40                                | 0.007266 | Yes                                  | Yes                                                  |
| 212686_at   | 57460  | PPM1H   | 12  | protein phosphatase 1H (PP2C domain containing)                                                     | Yes                        | 1.00                            | 0.42                                        | 0.30                                | 0.00027  | No                                   | No                                                   |
| 201703_s_at | 5514   | PPP1R10 | 6   | protein phosphatase 1, regulatory (inhibitor) subunit 10                                            | Yes                        | 0.95                            | 0.63                                        | 0.58                                | 0.047108 | Yes                                  | Yes                                                  |
| 205478_at   | 5502   | PPP1R1A | 12  | protein phosphatase 1, regulatory (inhibitor) subunit 1A                                            | Yes                        | 1.00                            | 0.74                                        | 0.70                                | 0.034178 | Yes                                  | Yes                                                  |
| 203057_s_at | 7799   | PRDM2   | 1   | PR domain containing 2, with ZNF domain                                                             | Yes                        | 0.42                            | 0.61                                        | 0.10                                | 0.011807 | No                                   | No                                                   |
| 204117_at   | 5550   | PREP    | 6   | prolyl endopeptidase                                                                                | Yes                        | 0.95                            | 0.68                                        | 0.45                                | 0.00092  | Yes                                  | Yes                                                  |
| 211743_s_at | 5553   | PRG2    | 11  | proteoglycan 2, bone marrow (natural killer cell activator, eosinophil granule major basic protein) | Yes                        | 0.16                            | 0.00                                        | 0.00                                | 0.015642 | Yes                                  | Yes                                                  |
| 206007_at   | 10216  | PRG4    | 1   | proteoglycan 4                                                                                      | Yes                        | 1.00                            | 0.95                                        | 0.83                                | 0.037924 | No                                   | No                                                   |
| 202801_at   | 5566   | PRKACA  | 19  | protein kinase, cAMP-dependent, catalytic, alpha                                                    | Yes                        | 1.00                            | 1.00                                        | 0.73                                | 3.96E-05 | Yes                                  | Yes                                                  |
| 203680_at   | 5577   | PRKAR2B | 7   | protein kinase, cAMP-dependent, regulatory, type II, beta                                           | Yes                        | 1.00                            | 1.00                                        | 0.85                                | 0.016151 | Yes                                  | Yes                                                  |
| 213010_at   | 112464 | PRKCDBP | 11  | protein kinase C, delta binding protein                                                             | Yes                        | 0.74                            | 0.37                                        | 0.28                                | 0.031927 | Yes                                  | Yes                                                  |
| 208973_at   | 79033  | PRNP    | 1   | prion protein interacting protein                                                                   | Yes                        | 0.68                            | 0.40                                        | 0.25                                | 0.017672 | Yes                                  | Yes                                                  |
| 209162_s_at | 9128   | PRPF4   | 9   | PRP4 pre-mRNA processing factor 4 homolog (yeast)                                                   | Yes                        | 0.95                            | 0.86                                        | 0.63                                | 0.008907 | Yes                                  | Yes                                                  |
| 219168_s_at | 55615  | PRR5    | 22  | proline rich 5 (renal)                                                                              | Yes                        | 0.21                            | 0.02                                        | 0.03                                | 0.018865 | Yes                                  | Yes                                                  |
| 218302_at   | 55851  | PSENEN  | 19  | presenilin enhancer 2 homolog (C. elegans)                                                          | Yes                        | 0.79                            | 0.63                                        | 0.35                                | 0.004559 | Yes                                  | Yes                                                  |
| 210195_s_at | 5669   | PSG1    | 19  | pregnancy specific beta-1-glycoprotein 1                                                            | Yes                        | 0.63                            | 0.12                                        | 0.23                                | 0.029642 | No                                   | No                                                   |
| 205956_x_at | 29893  | PSMC3IP | 17  | PSMC3 interacting protein                                                                           | NA                         | 0.58                            | 0.37                                        | 0.20                                | 0.027655 | NA                                   | NA                                                   |
| 205911_at   | 5745   | PTHR1   | 3   | parathyroid hormone receptor 1                                                                      | Yes                        | 1.00                            | 1.00                                        | 0.95                                | 0.024044 | No                                   | No                                                   |
| 200635_s_at | 5792   | PTPRF   | 1   | protein tyrosine phosphatase, receptor type, F                                                      | Yes                        | 1.00                            | 0.98                                        | 0.83                                | 0.007575 | Yes                                  | Yes                                                  |
| 200637_s_at | 5792   | PTPRF   | 1   | protein tyrosine phosphatase, receptor type, F                                                      | Yes                        | 1.00                            | 0.33                                        | 0.35                                | 0.000636 | Yes                                  | Yes                                                  |
| 215066_at   | 5792   | PTPRF   | 1   | protein tyrosine phosphatase, receptor type, F                                                      | Yes                        | 0.26                            | 0.09                                        | 0.00                                | 0.008103 | Yes                                  | Yes                                                  |
| 212012_at   | 7837   | PXDN    | 2   | peroxidasin homolog (Drosophila)                                                                    | NA                         | 0.84                            | 0.88                                        | 0.53                                | 0.002156 | NA                                   | NA                                                   |
| 221810_at   | 376267 | RAB15   | 14  | RAB15, member RAS oncogene family                                                                   | Yes                        | 0.47                            | 0.00                                        | 0.10                                | 0.013262 | Yes                                  | Yes                                                  |
| 219579_at   | 5866   | RAB3IL1 | 11  | RAB3A interacting protein (rabin3)-like 1                                                           | Yes                        | 0.42                            | 0.07                                        | 0.10                                | 0.03184  | Yes                                  | Yes                                                  |
| 215070_x_at | 23637  | RABGAP1 | 9   | RAB GTPase activating protein 1                                                                     | Yes                        | 0.79                            | 0.49                                        | 0.40                                | 0.043191 | Yes                                  | Yes                                                  |

Supplemental Table I

| ProbeSet    | Entrez | Symbol       | Chr | Gene name                                                                                         | Gene in<br>NCBI<br>dataset | Proportion<br>Present<br>Normal | Proportion<br>Present<br>Pre-<br>neoplastic | Proportion<br>Present<br>Neoplastic | q-value  | CpG<br>islands<br>(Takai &<br>Jones) | CpG<br>islands<br>(Gardiner-<br>Garden &<br>Frommer) |
|-------------|--------|--------------|-----|---------------------------------------------------------------------------------------------------|----------------------------|---------------------------------|---------------------------------------------|-------------------------------------|----------|--------------------------------------|------------------------------------------------------|
|             |        |              |     | RAB, member of RAS oncogene family-like                                                           |                            |                                 |                                             |                                     |          |                                      |                                                      |
| 220500_s_at | 11159  | RABL2A       | 2   | 2A                                                                                                | Yes                        | 0.95                            | 0.56                                        | 0.48                                | 0.014407 | Yes                                  | Yes                                                  |
| 205037_at   | 11020  | RABL4        | 22  | RAB, member of RAS oncogene family-like 4                                                         | Yes                        | 1.00                            | 0.56                                        | 0.38                                | 0.000384 | Yes                                  | Yes                                                  |
| 214422_at   | 5887   | RAD23B       | 9   | RAD23 homolog B ( <i>S. cerevisiae</i> )                                                          | NA                         | 0.89                            | 0.79                                        | 0.40                                | 0.000825 | NA                                   | NA                                                   |
| 218526_s_at | 29098  | RANGRF       | 17  | RAN guanine nucleotide release factor                                                             | NA                         | 0.95                            | 0.79                                        | 0.50                                | 0.00131  | NA                                   | NA                                                   |
| 203749_s_at | 5914   | RARA         | 17  | retinoic acid receptor, alpha                                                                     | Yes                        | 0.89                            | 0.70                                        | 0.53                                | 0.004853 | No                                   | No                                                   |
| 205115_s_at | 9904   | RBM19        | 12  | RNA binding motif protein 19                                                                      | Yes                        | 0.58                            | 0.33                                        | 0.20                                | 0.031927 | Yes                                  | Yes                                                  |
| 212028_at   | 58517  | RBM25        | 14  | RNA binding motif protein 25                                                                      | Yes                        | 0.47                            | 0.35                                        | 0.05                                | 0.001643 | Yes                                  | Yes                                                  |
| 220509_at   | 64062  | RBM26        | 13  | RNA binding motif protein 26                                                                      | Yes                        | 0.26                            | 0.18                                        | 0.03                                | 0.023701 | Yes                                  | Yes                                                  |
| 212104_s_at | 23543  | RBM9         | 22  | RNA binding motif protein 9                                                                       | Yes                        | 1.00                            | 0.98                                        | 0.80                                | 0.004032 | No                                   | Yes                                                  |
| 207836_s_at | 11030  | RBPMS        | 8   | RNA binding protein with multiple splicing                                                        | Yes                        | 0.84                            | 0.89                                        | 0.43                                | 0.000261 | Yes                                  | Yes                                                  |
| 207837_at   | 11030  | RBPMS        | 8   | RNA binding protein with multiple splicing                                                        | Yes                        | 0.53                            | 0.44                                        | 0.18                                | 0.017585 | Yes                                  | Yes                                                  |
| 211421_s_at | 5979   | RET          | 10  | ret proto-oncogene                                                                                | Yes                        | 0.47                            | 0.04                                        | 0.13                                | 0.030841 | Yes                                  | Yes                                                  |
| 201451_x_at | 6009   | RHEB         | 7   | Ras homolog enriched in brain                                                                     | Yes                        | 0.32                            | 0.04                                        | 0.00                                | 0.001176 | Yes                                  | Yes                                                  |
| 60471_at    | 79890  | RIN3         | 14  | Ras and Rab interactor 3                                                                          | Yes                        | 1.00                            | 0.63                                        | 0.48                                | 0.001171 | Yes                                  | Yes                                                  |
| 215588_x_at | 8780   | RIOK3        | 18  | RIO kinase 3 (yeast)                                                                              | Yes                        | 0.95                            | 1.00                                        | 0.65                                | 6.89E-05 | Yes                                  | Yes                                                  |
| 211753_s_at | 6013   | RLN1         | 9   | relaxin 1                                                                                         | Yes                        | 0.37                            | 0.04                                        | 0.05                                | 0.009611 | Yes                                  | Yes                                                  |
| 208632_at   | 9921   | RNF10        | 12  | ring finger protein 10                                                                            | Yes                        | 1.00                            | 1.00                                        | 0.88                                | 0.030277 | Yes                                  | Yes                                                  |
| 211387_x_at | 8732   | RNGTT        | 6   | RNA guanylyltransferase and 5'-phosphatase                                                        | Yes                        | 0.95                            | 0.75                                        | 0.55                                | 0.003326 | Yes                                  | Yes                                                  |
| 215861_at   | 80089  | RP4-724E16.2 | 20  | hypothetical protein FLJ14031                                                                     | NA                         | 0.26                            | 0.09                                        | 0.00                                | 0.015629 | NA                                   | NA                                                   |
| 214001_x_at | 6204   | RPS10        | 6   | ribosomal protein S10                                                                             | Yes                        | 1.00                            | 0.91                                        | 0.70                                | 0.005854 | Yes                                  | Yes                                                  |
| 213350_at   | 6205   | RPS11        | 19  | ribosomal protein S11                                                                             | Yes                        | 0.89                            | 0.79                                        | 0.48                                | 0.001915 | Yes                                  | Yes                                                  |
| 203777_s_at | 6199   | RPS6KB2      | 11  | ribosomal protein S6 kinase, 70kDa,<br>polypeptide 2<br>ribosome binding protein 1 homolog 180kDa | Yes                        | 0.95                            | 0.19                                        | 0.23                                | 0.000147 | Yes                                  | Yes                                                  |
| 201206_s_at | 6238   | RRBP1        | 20  | (dog)                                                                                             | Yes                        | 1.00                            | 0.98                                        | 0.75                                | 0.001132 | Yes                                  | Yes                                                  |
| 215620_at   | 6239   | RREB1        | 6   | ras responsive element binding protein 1                                                          | Yes                        | 0.89                            | 0.84                                        | 0.53                                | 0.003936 | Yes                                  | Yes                                                  |
| 213437_at   | 22902  | RUFY3        | 4   | RUN and FYVE domain containing 3                                                                  | Yes                        | 0.42                            | 0.07                                        | 0.03                                | 0.000352 | No                                   | No                                                   |
| 214712_at   | 400509 | RUNDC2B      | 16  | RUN domain containing 2B                                                                          | NA                         | 0.63                            | 0.37                                        | 0.28                                | 0.049937 | NA                                   | NA                                                   |
| 218377_s_at | 10069  | RWDD2B       | 21  | RWD domain containing 2B                                                                          | NA                         | 0.42                            | 0.39                                        | 0.10                                | 0.015418 | NA                                   | NA                                                   |
| 205863_at   | 6283   | S100A12      | 1   | S100 calcium binding protein A12                                                                  | Yes                        | 1.00                            | 0.56                                        | 0.20                                | 1.14E-06 | No                                   | Yes                                                  |
| 202917_s_at | 6279   | S100A8       | 1   | S100 calcium binding protein A8                                                                   | Yes                        | 1.00                            | 0.96                                        | 0.80                                | 0.016795 | No                                   | No                                                   |
| 214370_at   | 6279   | S100A8       | 1   | S100 calcium binding protein A8                                                                   | Yes                        | 0.32                            | 0.11                                        | 0.00                                | 0.003889 | No                                   | No                                                   |
| 203535_at   | 6280   | S100A9       | 1   | S100 calcium binding protein A9                                                                   | Yes                        | 1.00                            | 0.37                                        | 0.43                                | 0.005481 | No                                   | No                                                   |
| 214456_x_at | 6289   | SAA2         | 11  | serum amyloid A2                                                                                  | Yes                        | 1.00                            | 0.95                                        | 0.80                                | 0.024182 | No                                   | No                                                   |
| 222226_at   | 6290   | SAA3P        | 11  | serum amyloid A3 pseudogene                                                                       | Yes                        | 0.95                            | 0.25                                        | 0.25                                | 0.00032  | No                                   | No                                                   |
| 215495_s_at | 23034  | SAMD4A       | 14  | sterile alpha motif domain containing 4A                                                          | Yes                        | 0.53                            | 0.04                                        | 0.10                                | 0.01106  | Yes                                  | Yes                                                  |
| 217928_s_at | 55291  | SAPS3        | 11  | SAPS domain family, member 3                                                                      | Yes                        | 0.89                            | 0.88                                        | 0.68                                | 0.009183 | Yes                                  | Yes                                                  |

Supplemental Table I

| ProbeSet    | Entrez | Symbol   | Chr | Gene name                                                                                     | Gene in<br>NCBI<br>dataset | Proportion<br>Present<br>Normal | Proportion                    |                       | q-value  | CpG<br>islands<br>(Takai &<br>Jones) | CpG<br>islands<br>(Gardiner-<br>Garden &<br>Frommer) |
|-------------|--------|----------|-----|-----------------------------------------------------------------------------------------------|----------------------------|---------------------------------|-------------------------------|-----------------------|----------|--------------------------------------|------------------------------------------------------|
|             |        |          |     |                                                                                               |                            |                                 | Present<br>Pre-<br>neoplastic | Present<br>Neoplastic |          |                                      |                                                      |
| 200051_at   | 9092   | SART1    | 11  | squamous cell carcinoma antigen recognized<br>by T cells                                      | Yes                        | 0.89                            | 0.63                          | 0.48                  | 0.023709 | Yes                                  | Yes                                                  |
| 209127_s_at | 9733   | SART3    | 12  | squamous cell carcinoma antigen recognized<br>by T cells 3                                    | Yes                        | 0.53                            | 0.46                          | 0.10                  | 0.004763 | Yes                                  | Yes                                                  |
| 39835_at    | 6305   | SBF1     | 22  | SET binding factor 1                                                                          | Yes                        | 0.58                            | 0.32                          | 0.10                  | 0.000727 | Yes                                  | Yes                                                  |
| 218681_s_at | 23753  | SDF2L1   | 22  | stromal cell-derived factor 2-like 1                                                          | Yes                        | 1.00                            | 0.70                          | 0.55                  | 0.002873 | Yes                                  | Yes                                                  |
| 205695_at   | 10993  | SDS      | 12  | serine dehydratase                                                                            | Yes                        | 1.00                            | 1.00                          | 0.88                  | 0.029437 | No                                   | No                                                   |
| 202082_s_at | 6397   | SEC14L1  | 17  | SEC14-like 1 (S. cerevisiae)                                                                  | Yes                        | 0.89                            | 0.89                          | 0.65                  | 0.036662 | Yes                                  | Yes                                                  |
| 202083_s_at | 6397   | SEC14L1  | 17  | SEC14-like 1 (S. cerevisiae)                                                                  | Yes                        | 0.89                            | 0.89                          | 0.63                  | 0.010357 | Yes                                  | Yes                                                  |
| 216402_at   | 284904 | SEC14L4  | 22  | SEC14-like 4 (S. cerevisiae)                                                                  | Yes                        | 0.68                            | 0.30                          | 0.28                  | 0.035096 | Yes                                  | Yes                                                  |
| 215209_at   | 9871   | SEC24D   | 4   | SEC24 related gene family, member D (S.<br>cerevisiae)                                        | Yes                        | 0.32                            | 0.11                          | 0.00                  | 0.002744 | Yes                                  | Yes                                                  |
| 215641_at   | 9871   | SEC24D   | 4   | SEC24 related gene family, member D (S.<br>cerevisiae)                                        | Yes                        | 0.58                            | 0.40                          | 0.23                  | 0.021606 | Yes                                  | Yes                                                  |
| 219499_at   | 55176  | SEC61A2  | 10  | Sec61 alpha 2 subunit (S. cerevisiae)                                                         | Yes                        | 0.84                            | 0.28                          | 0.23                  | 0.000456 | Yes                                  | Yes                                                  |
| 202062_s_at | 6400   | SEL1L    | 14  | sel-1 suppressor of lin-12-like (C. elegans)                                                  | Yes                        | 0.95                            | 0.42                          | 0.48                  | 0.01365  | Yes                                  | Yes                                                  |
| 202063_s_at | 6400   | SEL1L    | 14  | sel-1 suppressor of lin-12-like (C. elegans)                                                  | Yes                        | 0.32                            | 0.00                          | 0.00                  | 0.000408 | Yes                                  | Yes                                                  |
| 57703_at    | 205564 | SENP5    | 3   | SUMO1/sentrin specific peptidase 5                                                            | Yes                        | 0.68                            | 0.47                          | 0.20                  | 0.007622 | Yes                                  | Yes                                                  |
| 202319_at   | 26054  | SENP6    | 6   | SUMO1/sentrin specific peptidase 6                                                            | Yes                        | 1.00                            | 0.86                          | 0.78                  | 0.048948 | Yes                                  | Yes                                                  |
| 208941_s_at | 22929  | SEPHS1   | 10  | selenophosphate synthetase 1                                                                  | Yes                        | 1.00                            | 0.95                          | 0.73                  | 0.005375 | Yes                                  | Yes                                                  |
| 210172_at   | 7536   | SF1      | 11  | splicing factor 1                                                                             | Yes                        | 0.79                            | 0.82                          | 0.33                  | 0.000352 | Yes                                  | Yes                                                  |
| 201356_at   | 10291  | SF3A1    | 22  | splicing factor 3a, subunit 1, 120kDa                                                         | Yes                        | 0.95                            | 0.88                          | 0.58                  | 0.001822 | Yes                                  | Yes                                                  |
| 212177_at   | 25957  | SFRS18   | 6   | splicing factor, arginine/serine-rich 18                                                      | NA                         | 1.00                            | 1.00                          | 0.95                  | 0.040984 | NA                                   | NA                                                   |
| 209376_x_at | 9169   | SFRS2IP  | 12  | splicing factor, arginine/serine-rich 2,<br>interacting protein                               | Yes                        | 1.00                            | 1.00                          | 0.73                  | 5.45E-05 | No                                   | No                                                   |
| 213936_x_at | 6439   | SFTPB    | 2   | surfactant protein B                                                                          | Yes                        | 0.95                            | 0.51                          | 0.33                  | 0.001352 | No                                   | No                                                   |
| 213464_at   | 25759  | SHC2     | 19  | SHC (Src homology 2 domain containing)<br>transforming protein 2                              | NA                         | 1.00                            | 0.93                          | 0.78                  | 0.012725 | NA                                   | NA                                                   |
| 219713_at   | 23729  | SHPK     | 17  | sedoheptulokinase                                                                             | NA                         | 0.84                            | 0.63                          | 0.45                  | 0.019691 | NA                                   | NA                                                   |
| 202980_s_at | 6477   | SIAH1    | 16  | seven in absentia homolog 1 (Drosophila)                                                      | Yes                        | 0.79                            | 0.56                          | 0.35                  | 0.007699 | Yes                                  | Yes                                                  |
| 218436_at   | 64374  | SIL1     | 5   | SIL1 homolog, endoplasmic reticulum<br>chaperone (S. cerevisiae)                              | Yes                        | 1.00                            | 0.77                          | 0.70                  | 0.027391 | Yes                                  | Yes                                                  |
| 202895_s_at | 140885 | SIRPA    | 20  | signal-regulatory protein alpha                                                               | NA                         | 1.00                            | 0.44                          | 0.50                  | 0.018441 | NA                                   | NA                                                   |
| 221562_s_at | 23410  | SIRT3    | 11  | sirtuin (silent mating type information<br>regulation 2 homolog) 3 (S. cerevisiae)            | NA                         | 1.00                            | 0.61                          | 0.48                  | 0.00157  | NA                                   | NA                                                   |
| 204270_at   | 6497   | SKI      | 1   | v-ski sarcoma viral oncogene homolog (avian)<br>solute carrier family 16, member 10 (aromatic | Yes                        | 0.63                            | 0.28                          | 0.13                  | 0.002024 | Yes                                  | Yes                                                  |
| 219915_s_at | 117247 | SLC16A10 | 6   | amino acid transporter)                                                                       | Yes                        | 0.47                            | 0.30                          | 0.13                  | 0.035824 | Yes                                  | Yes                                                  |

Supplemental Table I

| ProbeSet    | Entrez | Symbol  | Chr | Gene name                                                                                                                                      | Gene in<br>NCBI<br>dataset | Proportion<br>Present<br>Normal | Proportion<br>Present<br>Pre-<br>neoplastic | Proportion<br>Present<br>Neoplastic | q-value  | CpG<br>islands<br>(Takai &<br>Jones) | CpG<br>islands<br>(Gardiner-<br>Garden &<br>Frommer) |
|-------------|--------|---------|-----|------------------------------------------------------------------------------------------------------------------------------------------------|----------------------------|---------------------------------|---------------------------------------------|-------------------------------------|----------|--------------------------------------|------------------------------------------------------|
| 207057_at   | 9194   | SLC16A7 | 12  | solute carrier family 16, member 7<br>(monocarboxylic acid transporter 2)                                                                      | Yes                        | 1.00                            | 1.00                                        | 0.80                                | 0.006016 | No                                   | No                                                   |
| 208389_s_at | 6506   | SLC1A2  | 11  | solute carrier family 1 (glial high affinity<br>glutamate transporter), member 2                                                               | Yes                        | 1.00                            | 0.47                                        | 0.40                                | 0.000868 | Yes                                  | Yes                                                  |
| 212810_s_at | 6509   | SLC1A4  | 2   | solute carrier family 1 (glutamate/neutral<br>amino acid transporter), member 4                                                                | Yes                        | 0.74                            | 0.16                                        | 0.33                                | 0.026383 | Yes                                  | Yes                                                  |
| 205097_at   | 1836   | SLC26A2 | 5   | solute carrier family 26 (sulfate transporter),<br>member 2                                                                                    | Yes                        | 0.89                            | 0.98                                        | 0.73                                | 0.028797 | Yes                                  | Yes                                                  |
| 218727_at   | 55238  | SLC38A7 | 16  | solute carrier family 38, member 7<br>solute carrier family 39 (zinc transporter),<br>member 7                                                 | NA                         | 0.53                            | 0.33                                        | 0.10                                | 0.002578 | NA                                   | NA                                                   |
| 202667_s_at | 7922   | SLC39A7 | 6   | solute carrier family 45, member 2                                                                                                             | Yes                        | 0.68                            | 0.16                                        | 0.25                                | 0.023984 | Yes                                  | Yes                                                  |
| 220245_at   | 51151  | SLC45A2 | 5   | solute carrier family 4, anion exchanger,<br>member 2 (erythrocyte membrane protein<br>band 3-like 1)                                          | Yes                        | 0.47                            | 0.07                                        | 0.08                                | 0.003877 | No                                   | No                                                   |
| 202111_at   | 6522   | SLC4A2  | 7   | solute carrier family 5 (sodium-dependent<br>vitamin transporter), member 6                                                                    | Yes                        | 0.68                            | 0.28                                        | 0.25                                | 0.015629 | Yes                                  | Yes                                                  |
| 204087_s_at | 8884   | SLC5A6  | 2   | solute carrier family 7 (cationic amino acid<br>transporter, y+ system), member 4                                                              | Yes                        | 0.63                            | 0.39                                        | 0.18                                | 0.013482 | Yes                                  | Yes                                                  |
| 205864_at   | 6545   | SLC7A4  | 22  | solute carrier family 9 (sodium/hydrogen<br>exchanger), member 8                                                                               | NA                         | 0.21                            | 0.02                                        | 0.00                                | 0.008937 | NA                                   | NA                                                   |
| 212947_at   | 23315  | SLC9A8  | 20  | solute carrier organic anion transporter family,<br>member 1A2                                                                                 | Yes                        | 0.79                            | 0.11                                        | 0.15                                | 0.000131 | Yes                                  | Yes                                                  |
| 207308_at   | 6579   | SLCO1A2 | 12  | solute carrier organic anion transporter family,<br>member 1A2                                                                                 | Yes                        | 0.42                            | 0.07                                        | 0.10                                | 0.008801 | Yes                                  | Yes                                                  |
| 211480_s_at | 6579   | SLCO1A2 | 12  | solute carrier organic anion transporter family,<br>member 1A2                                                                                 | Yes                        | 0.16                            | 0.00                                        | 0.00                                | 0.015642 | Yes                                  | Yes                                                  |
| 211481_at   | 6579   | SLCO1A2 | 12  | solute carrier organic anion transporter family,<br>member 1A2                                                                                 | Yes                        | 0.32                            | 0.02                                        | 0.00                                | 0.000805 | Yes                                  | Yes                                                  |
| 222071_s_at | 353189 | SLCO4C1 | 5   | solute carrier organic anion transporter family,<br>member 4C1                                                                                 | Yes                        | 1.00                            | 0.70                                        | 0.63                                | 0.039789 | Yes                                  | Yes                                                  |
| 206732_at   | 22865  | SLITRK3 | 3   | SLIT and NTRK-like family, member 3<br>SWI/SNF related, matrix associated, actin<br>dependent regulator of chromatin, subfamily<br>a, member 4 | Yes                        | 0.58                            | 0.00                                        | 0.00                                | 6.33E-07 | Yes                                  | Yes                                                  |
| 208794_s_at | 6597   | SMARCA4 | 19  | SWI/SNF related, matrix associated, actin<br>dependent regulator of chromatin, subfamily<br>a, member 5                                        | Yes                        | 0.84                            | 0.46                                        | 0.30                                | 0.000816 | Yes                                  | Yes                                                  |
| 213859_x_at | 8467   | SMARCA5 | 4   | sphingomyelin phosphodiesterase 1, acid<br>lysosomal                                                                                           | Yes                        | 0.21                            | 0.63                                        | 0.05                                | 0.043558 | Yes                                  | Yes                                                  |
| 209420_s_at | 6609   | SMPD1   | 11  |                                                                                                                                                | Yes                        | 1.00                            | 1.00                                        | 0.75                                | 0.001365 | Yes                                  | Yes                                                  |

## Supplemental Table I

| ProbeSet    | Entrez | Symbol  | Chr | Gene name                                                                            | Gene in<br>NCBI<br>dataset | Proportion                      |                                             |                                     | q-value  | CpG<br>islands<br>(Takai &<br>Jones) | CpG<br>islands<br>(Gardiner-<br>Garden &<br>Frommer) |
|-------------|--------|---------|-----|--------------------------------------------------------------------------------------|----------------------------|---------------------------------|---------------------------------------------|-------------------------------------|----------|--------------------------------------|------------------------------------------------------|
|             |        |         |     |                                                                                      |                            | Proportion<br>Present<br>Normal | Proportion<br>Present<br>Pre-<br>neoplastic | Proportion<br>Present<br>Neoplastic |          |                                      |                                                      |
| 219695_at   | 55512  | SMPD3   | 16  | sphingomyelin phosphodiesterase 3, neutral<br>membrane (neutral sphingomyelinase II) | Yes                        | 0.37                            | 0.07                                        | 0.10                                | 0.015642 | Yes                                  | Yes                                                  |
| 212666_at   | 57154  | SMURF1  | 7   | SMAD specific E3 ubiquitin protein ligase 1<br>small nuclear ribonucleoprotein 70kDa | NA                         | 0.79                            | 0.70                                        | 0.43                                | 0.010787 | NA                                   | NA                                                   |
| 201221_s_at | 6625   | SNRP70  | 19  | polypeptide (RNP antigen)                                                            | Yes                        | 1.00                            | 0.79                                        | 0.70                                | 0.044054 | Yes                                  | Yes                                                  |
| 215722_s_at | 6627   | SNRPA1  | 15  | small nuclear ribonucleoprotein polypeptide A'                                       | Yes                        | 0.79                            | 0.89                                        | 0.58                                | 0.030341 | Yes                                  | Yes                                                  |
| 216977_x_at | 6627   | SNRPA1  | 15  | small nuclear ribonucleoprotein polypeptide A'                                       | Yes                        | 0.74                            | 0.60                                        | 0.33                                | 0.003904 | Yes                                  | Yes                                                  |
| 215450_at   | 6635   | SNRPE   | 1   | small nuclear ribonucleoprotein polypeptide E                                        | Yes                        | 0.84                            | 0.74                                        | 0.48                                | 0.013086 | Yes                                  | Yes                                                  |
| 202359_s_at | 399979 | SNX19   | 11  | sorting nexin 19                                                                     | Yes                        | 0.89                            | 0.44                                        | 0.30                                | 0.001178 | Yes                                  | Yes                                                  |
| 221006_s_at | 81609  | SNX27   | 1   | sorting nexin family member 27                                                       | Yes                        | 0.89                            | 0.12                                        | 0.08                                | 6.53E-07 | Yes                                  | Yes                                                  |
| 215078_at   | 6648   | SOD2    | 6   | superoxide dismutase 2, mitochondrial                                                | Yes                        | 0.53                            | 0.82                                        | 0.25                                | 0.005691 | Yes                                  | Yes                                                  |
| 201085_s_at | 6651   | SON     | 21  | SON DNA binding protein                                                              | Yes                        | 0.37                            | 0.79                                        | 0.20                                | 0.020623 | Yes                                  | Yes                                                  |
| 206056_x_at | 6693   | SPN     | 16  | sialophorin<br>splA/ryanodine receptor domain and SOCS                               | Yes                        | 0.95                            | 0.47                                        | 0.45                                | 0.000597 | No                                   | Yes                                                  |
| 219677_at   | 80176  | SPSB1   | 1   | box containing 1<br>sterol regulatory element binding transcription                  | Yes                        | 1.00                            | 0.74                                        | 0.73                                | 0.045978 | Yes                                  | Yes                                                  |
| 202308_at   | 6720   | SREBF1  | 17  | factor 1<br>sterol regulatory element binding transcription                          | Yes                        | 1.00                            | 0.91                                        | 0.63                                | 0.000606 | Yes                                  | Yes                                                  |
| 201248_s_at | 6721   | SREBF2  | 22  | factor 2                                                                             | Yes                        | 0.47                            | 0.11                                        | 0.18                                | 0.022367 | Yes                                  | Yes                                                  |
| 202401_s_at | 6722   | SRF     | 6   | serum response factor (c-fos serum response<br>element-binding transcription factor) | Yes                        | 0.63                            | 0.75                                        | 0.40                                | 0.036517 | Yes                                  | Yes                                                  |
| 201516_at   | 6723   | SRM     | 1   | spermidine synthase                                                                  | Yes                        | 0.95                            | 0.77                                        | 0.68                                | 0.037924 | Yes                                  | Yes                                                  |
| 201224_s_at | 10250  | SRRM1   | 1   | serine/arginine repetitive matrix 1                                                  | Yes                        | 0.37                            | 0.63                                        | 0.15                                | 0.032132 | Yes                                  | Yes                                                  |
| 200957_s_at | 6749   | SSRP1   | 11  | structure specific recognition protein 1                                             | Yes                        | 1.00                            | 0.86                                        | 0.60                                | 0.001328 | Yes                                  | Yes                                                  |
| 208322_s_at | 6482   | ST3GAL1 | 8   | ST3 beta-galactoside alpha-2,3-<br>sialyltransferase 1                               | Yes                        | 0.89                            | 0.88                                        | 0.65                                | 0.023754 | Yes                                  | Yes                                                  |
| 213335_s_at | 10402  | ST3GAL6 | 3   | ST3 beta-galactoside alpha-2,3-<br>sialyltransferase 6                               | Yes                        | 0.84                            | 0.04                                        | 0.13                                | 1.41E-05 | Yes                                  | Yes                                                  |
| 202440_s_at | 6764   | ST5     | 11  | suppression of tumorigenicity 5                                                      | Yes                        | 0.53                            | 0.53                                        | 0.25                                | 0.018801 | Yes                                  | Yes                                                  |
| 207524_at   | 7982   | ST7     | 7   | suppression of tumorigenicity 7                                                      | NA                         | 0.37                            | 0.09                                        | 0.10                                | 0.046666 | NA                                   | NA                                                   |
| 215044_s_at | 10254  | STAM2   | 2   | signal transducing adaptor molecule (SH3<br>domain and ITAM motif) 2                 | Yes                        | 0.79                            | 0.51                                        | 0.28                                | 0.002367 | Yes                                  | Yes                                                  |
| 202991_at   | 10948  | STARD3  | 17  | StAR-related lipid transfer (START) domain<br>containing 3                           | Yes                        | 0.26                            | 0.02                                        | 0.05                                | 0.044696 | Yes                                  | Yes                                                  |

Supplemental Table I

| ProbeSet    | Entrez | Symbol  | Chr | Gene name                                                                           | Gene in<br>NCBI<br>dataset | Proportion<br>Present<br>Normal | Proportion<br>Present<br>Pre-<br>neoplastic | Proportion<br>Present<br>Neoplastic | q-value  | CpG<br>islands<br>(Takai &<br>Jones) | CpG<br>islands<br>(Gardiner-<br>Garden &<br>Frommer) |
|-------------|--------|---------|-----|-------------------------------------------------------------------------------------|----------------------------|---------------------------------|---------------------------------------------|-------------------------------------|----------|--------------------------------------|------------------------------------------------------|
| 213820_s_at | 80765  | STARD5  | 15  | StAR-related lipid transfer (START) domain<br>containing 5                          | NA                         | 0.84                            | 0.28                                        | 0.03                                | 1.55E-07 | NA                                   | NA                                                   |
| 208992_s_at | 6774   | STAT3   | 17  | signal transducer and activator of transcription<br>3 (acute-phase response factor) | Yes                        | 0.68                            | 0.54                                        | 0.23                                | 0.000362 | Yes                                  | Yes                                                  |
| 212550_at   | 6777   | STAT5B  | 17  | 5B                                                                                  | Yes                        | 1.00                            | 0.28                                        | 0.50                                | 0.035461 | Yes                                  | Yes                                                  |
| 221236_s_at | 81551  | STMN4   | 8   | stathmin-like 4                                                                     | Yes                        | 0.16                            | 0.00                                        | 0.00                                | 0.023128 | No                                   | No                                                   |
| 209478_at   | 201254 | STRA13  | 17  | stimulated by retinoic acid 13 homolog<br>(mouse)                                   | Yes                        | 1.00                            | 0.60                                        | 0.60                                | 0.026122 | Yes                                  | Yes                                                  |
| 217934_x_at | 10273  | STUB1   | 16  | 1                                                                                   | Yes                        | 1.00                            | 0.86                                        | 0.68                                | 0.003335 | Yes                                  | Yes                                                  |
| 220995_at   | 29091  | STXBP6  | 14  | syntaxin binding protein 6 (amisyn)                                                 | Yes                        | 0.74                            | 0.04                                        | 0.03                                | 3.11E-07 | Yes                                  | Yes                                                  |
| 206740_x_at | 6847   | SYCP1   | 1   | synaptonemal complex protein 1                                                      | NA                         | 0.68                            | 0.04                                        | 0.05                                | 1.98E-06 | NA                                   | NA                                                   |
| 216917_s_at | 6847   | SYCP1   | 1   | synaptonemal complex protein 1                                                      | NA                         | 0.42                            | 0.07                                        | 0.03                                | 0.002635 | NA                                   | NA                                                   |
| 205613_at   | 51760  | SYT17   | 16  | synaptotagmin XVII                                                                  | Yes                        | 0.74                            | 0.25                                        | 0.23                                | 0.003477 | Yes                                  | Yes                                                  |
| 214690_at   | 9014   | TAF1B   | 2   | TATA box binding protein (TBP)-associated<br>factor, RNA polymerase I, B, 63kDa     | Yes                        | 0.95                            | 0.63                                        | 0.58                                | 0.038733 | Yes                                  | Yes                                                  |
| 221616_s_at | 51616  | TAF9B   | X   | TAF9B RNA polymerase II, TATA box binding<br>protein (TBP)-associated factor, 31kDa | Yes                        | 0.79                            | 0.54                                        | 0.13                                | 9.56E-05 | Yes                                  | Yes                                                  |
| 206283_s_at | 6886   | TAL1    | 1   | T-cell acute lymphocytic leukemia 1                                                 | Yes                        | 0.95                            | 0.79                                        | 0.48                                | 0.000636 | Yes                                  | Yes                                                  |
| 204878_s_at | 9344   | TAOK2   | 16  | TAO kinase 2                                                                        | Yes                        | 0.74                            | 0.32                                        | 0.30                                | 0.020957 | Yes                                  | Yes                                                  |
| 204986_s_at | 9344   | TAOK2   | 16  | TAO kinase 2                                                                        | Yes                        | 0.79                            | 0.19                                        | 0.30                                | 0.032004 | Yes                                  | Yes                                                  |
| 221391_at   | 50840  | TAS2R14 | 12  | taste receptor, type 2, member 14                                                   | Yes                        | 0.32                            | 0.12                                        | 0.00                                | 0.007466 | No                                   | No                                                   |
| 214413_at   | 6898   | TAT     | 16  | tyrosine aminotransferase                                                           | Yes                        | 1.00                            | 1.00                                        | 0.80                                | 0.006016 | No                                   | No                                                   |
| 37278_at    | 6901   | TAZ     | X   | tafazzin                                                                            | NA                         | 0.74                            | 0.54                                        | 0.38                                | 0.025722 | NA                                   | NA                                                   |
| 215640_at   | 23102  | TBC1D2B | 15  | TBC1 domain family, member 2B                                                       | Yes                        | 0.79                            | 0.88                                        | 0.40                                | 0.003255 | Yes                                  | Yes                                                  |
| 201868_s_at | 6907   | TBL1X   | X   | transducin (beta)-like 1X-linked                                                    | NA                         | 0.21                            | 0.02                                        | 0.00                                | 0.012671 | NA                                   | NA                                                   |
| 213401_s_at | 6907   | TBL1X   | X   | transducin (beta)-like 1X-linked                                                    | NA                         | 0.47                            | 0.04                                        | 0.00                                | 1.57E-05 | NA                                   | NA                                                   |
| 203135_at   | 6908   | TBP     | 6   | TATA box binding protein                                                            | Yes                        | 1.00                            | 0.96                                        | 0.80                                | 0.030066 | Yes                                  | Yes                                                  |
| 336_at      | 6915   | TBXA2R  | 19  | thromboxane A2 receptor                                                             | Yes                        | 0.21                            | 0.37                                        | 0.03                                | 0.046069 | Yes                                  | Yes                                                  |
| 202818_s_at | 6924   | TCEB3   | 1   | transcription elongation factor B (SIII),<br>polypeptide 3 (110kDa, elongin A)      | Yes                        | 0.74                            | 0.63                                        | 0.15                                | 0.000139 | Yes                                  | Yes                                                  |
| 213604_at   | 6924   | TCEB3   | 1   | transcription elongation factor B (SIII),<br>polypeptide 3                          | Yes                        | 1.00                            | 0.95                                        | 0.80                                | 0.039137 | Yes                                  | Yes                                                  |
| 213311_s_at | 22980  | TCF25   | 16  | transcription factor 25 (basic helix-loop-helix)                                    | Yes                        | 0.95                            | 0.96                                        | 0.75                                | 0.018123 | Yes                                  | Yes                                                  |
| 221016_s_at | 83439  | TCF7L1  | 2   | transcription factor 7-like 1 (T-cell specific,<br>HMG-box)                         | Yes                        | 0.84                            | 0.86                                        | 0.58                                | 0.016301 | Yes                                  | Yes                                                  |



Supplemental Table I

| ProbeSet    | Entrez | Symbol   | Chr | Gene name                                                                                                                   | Gene in<br>NCBI<br>dataset | Proportion                      |                                             |                                     | q-value  | CpG<br>islands<br>(Takai &<br>Jones) | CpG<br>islands<br>(Gardiner-<br>Garden &<br>Frommer) |
|-------------|--------|----------|-----|-----------------------------------------------------------------------------------------------------------------------------|----------------------------|---------------------------------|---------------------------------------------|-------------------------------------|----------|--------------------------------------|------------------------------------------------------|
|             |        |          |     |                                                                                                                             |                            | Proportion<br>Present<br>Normal | Proportion<br>Present<br>Pre-<br>neoplastic | Proportion<br>Present<br>Neoplastic |          |                                      |                                                      |
| 41037_at    | 7004   | TEAD4    | 12  | TEA domain family member 4<br>tensin like C1 domain containing phosphatase                                                  | Yes                        | 0.68                            | 0.37                                        | 0.23                                | 0.003874 | Yes                                  | Yes                                                  |
| 212494_at   | 23371  | TENC1    | 12  | (tensin 2)                                                                                                                  | Yes                        | 0.84                            | 1.00                                        | 0.68                                | 0.018812 | Yes                                  | Yes                                                  |
| 203176_s_at | 7019   | TFAM     | 10  | transcription factor A, mitochondrial<br>tissue factor pathway inhibitor (lipoprotein-<br>associated coagulation inhibitor) | Yes                        | 0.95                            | 0.91                                        | 0.68                                | 0.004721 | Yes                                  | Yes                                                  |
| 214378_at   | 7035   | TFPI     | 2   | tissue factor pathway inhibitor (lipoprotein-<br>associated coagulation inhibitor)                                          | Yes                        | 1.00                            | 0.42                                        | 0.18                                | 2.86E-06 | No                                   | No                                                   |
| 215447_at   | 7035   | TFPI     | 2   | transglutaminase 2 (C polypeptide, protein-<br>associated coagulation inhibitor)                                            | Yes                        | 1.00                            | 0.95                                        | 0.80                                | 0.024182 | No                                   | No                                                   |
| 216183_at   | 7052   | TGM2     | 20  | glutamine-gamma-glutamyltransferase)                                                                                        | Yes                        | 0.26                            | 0.05                                        | 0.00                                | 0.018812 | Yes                                  | Yes                                                  |
| 211154_at   | 7066   | THPO     | 3   | thrombopoietin                                                                                                              | Yes                        | 0.74                            | 0.02                                        | 0.10                                | 2.42E-05 | Yes                                  | No                                                   |
| 219248_at   | 80745  | THUMPD2  | 2   | THUMP domain containing 2<br>TIA1 cytotoxic granule-associated RNA                                                          | Yes                        | 1.00                            | 0.93                                        | 0.78                                | 0.018123 | Yes                                  | Yes                                                  |
| 202405_at   | 7073   | TIAL1    | 10  | binding protein-like 1                                                                                                      | Yes                        | 0.89                            | 0.53                                        | 0.43                                | 0.009745 | Yes                                  | Yes                                                  |
| 213135_at   | 7074   | TIAM1    | 21  | T-cell lymphoma invasion and metastasis 1<br>translocase of inner mitochondrial membrane                                    | Yes                        | 0.84                            | 1.00                                        | 0.65                                | 0.015418 | Yes                                  | Yes                                                  |
| 218408_at   | 26519  | TIMM10   | 11  | 10 homolog (yeast)<br>transducin-like enhancer of split 3 (E(sp1)                                                           | Yes                        | 0.84                            | 0.75                                        | 0.45                                | 0.003229 | Yes                                  | Yes                                                  |
| 206472_s_at | 7090   | TLE3     | 15  | homolog, Drosophila)                                                                                                        | Yes                        | 0.89                            | 0.54                                        | 0.48                                | 0.040705 | Yes                                  | Yes                                                  |
| 212703_at   | 83660  | TLN2     | 15  | talin 2<br>transmembrane emp24 protein transport                                                                            | Yes                        | 0.53                            | 0.14                                        | 0.10                                | 0.005252 | No                                   | No                                                   |
| 208757_at   | 54732  | TMED9    | 5   | domain containing 9                                                                                                         | Yes                        | 1.00                            | 1.00                                        | 0.73                                | 0.000541 | Yes                                  | Yes                                                  |
| 219690_at   | 79713  | TMEM149  | 19  | transmembrane protein 149                                                                                                   | Yes                        | 1.00                            | 0.77                                        | 0.63                                | 0.012725 | No                                   | No                                                   |
| 52078_at    | 84065  | TMEM222  | 1   | transmembrane protein 222                                                                                                   | NA                         | 0.84                            | 0.19                                        | 0.38                                | 0.045302 | NA                                   | NA                                                   |
| 218770_s_at | 55116  | TMEM39B  | 1   | transmembrane protein 39B                                                                                                   | Yes                        | 0.42                            | 0.32                                        | 0.00                                | 0.001161 | Yes                                  | Yes                                                  |
| 219503_s_at | 55287  | TMEM40   | 3   | transmembrane protein 40                                                                                                    | Yes                        | 0.37                            | 0.05                                        | 0.08                                | 0.024723 | No                                   | No                                                   |
| 219462_at   | 79639  | TMEM53   | 1   | transmembrane protein 53                                                                                                    | Yes                        | 1.00                            | 0.47                                        | 0.55                                | 0.034017 | Yes                                  | Yes                                                  |
| 202700_s_at | 9725   | TMEM63A  | 1   | transmembrane protein 63A<br>tumor necrosis factor (ligand) superfamily,                                                    | NA                         | 0.68                            | 0.51                                        | 0.25                                | 0.018615 | NA                                   | NA                                                   |
| 207907_at   | 8740   | TNFSF14  | 19  | member 14                                                                                                                   | Yes                        | 0.53                            | 0.11                                        | 0.10                                | 0.005529 | No                                   | Yes                                                  |
| 213109_at   | 23043  | TNIK     | 3   | TRAF2 and NCK interacting kinase<br>translocase of outer mitochondrial membrane                                             | Yes                        | 1.00                            | 0.91                                        | 0.78                                | 0.006079 | Yes                                  | Yes                                                  |
| 201870_at   | 10953  | TOMM34   | 20  | 34                                                                                                                          | Yes                        | 0.95                            | 0.86                                        | 0.58                                | 0.001603 | Yes                                  | Yes                                                  |
| 203786_s_at | 7164   | TPD52L1  | 6   | tumor protein D52-like 1                                                                                                    | Yes                        | 0.79                            | 0.63                                        | 0.48                                | 0.020254 | Yes                                  | Yes                                                  |
| 1729_at     | 8717   | TRADD    | 16  | TNFRSF1A-associated via death domain                                                                                        | Yes                        | 0.95                            | 0.63                                        | 0.48                                | 0.003652 | Yes                                  | Yes                                                  |
| 202987_at   | 10758  | TRAF3IP2 | 6   | TRAF3 interacting protein 2                                                                                                 | Yes                        | 0.37                            | 0.14                                        | 0.05                                | 0.024182 | Yes                                  | Yes                                                  |
| 214924_s_at | 22906  | TRAK1    | 3   | trafficking protein, kinesin binding 1                                                                                      | Yes                        | 0.95                            | 0.72                                        | 0.38                                | 1.53E-05 | No                                   | No                                                   |
| 202124_s_at | 66008  | TRAK2    | 2   | trafficking protein, kinesin binding 2                                                                                      | Yes                        | 0.95                            | 0.89                                        | 0.60                                | 0.00226  | Yes                                  | Yes                                                  |
| 202368_s_at | 9697   | TRAM2    | 6   | translocation associated membrane protein 2                                                                                 | Yes                        | 1.00                            | 0.77                                        | 0.70                                | 0.030864 | Yes                                  | Yes                                                  |

Supplemental Table I

| ProbeSet    | Entrez | Symbol   | Chr | Gene name                                                                                            | Gene in<br>NCBI<br>dataset | Proportion<br>Present<br>Normal | Proportion<br>Present<br>Pre-<br>neoplastic | Proportion<br>Present<br>Neoplastic | q-value  | CpG<br>islands<br>(Takai &<br>Jones) | CpG<br>islands<br>(Gardiner-<br>Garden &<br>Frommer) |
|-------------|--------|----------|-----|------------------------------------------------------------------------------------------------------|----------------------------|---------------------------------|---------------------------------------------|-------------------------------------|----------|--------------------------------------|------------------------------------------------------|
| 215269_at   | 7109   | TRAPPC10 | 21  | trafficking protein particle complex 10                                                              | NA                         | 0.89                            | 0.91                                        | 0.65                                | 0.021521 | NA                                   | NA                                                   |
| 204985_s_at | 79090  | TRAPPC6A | 19  | trafficking protein particle complex 6A<br>thyrotropin-releasing hormone degrading                   | Yes                        | 0.84                            | 0.56                                        | 0.43                                | 0.011234 | Yes                                  | Yes                                                  |
| 219937_at   | 29953  | TRHDE    | 12  | enzyme                                                                                               | Yes                        | 0.53                            | 0.00                                        | 0.05                                | 0.000211 | Yes                                  | Yes                                                  |
| 215945_s_at | 23321  | TRIM2    | 4   | tripartite motif-containing 2                                                                        | Yes                        | 1.00                            | 0.88                                        | 0.75                                | 0.03065  | No                                   | No                                                   |
| 213748_at   | 9866   | TRIM66   | 11  | tripartite motif-containing 66                                                                       | NA                         | 1.00                            | 0.68                                        | 0.58                                | 0.003904 | NA                                   | NA                                                   |
| 219405_at   | 55128  | TRIM68   | 11  | tripartite motif-containing 68                                                                       | Yes                        | 0.63                            | 0.35                                        | 0.20                                | 0.014504 | Yes                                  | Yes                                                  |
| 205665_at   | 10867  | TSPAN9   | 12  | tetraspanin 9                                                                                        | NA                         | 0.84                            | 0.09                                        | 0.05                                | 6.86E-07 | NA                                   | NA                                                   |
| 220968_s_at | 10867  | TSPAN9   | 12  | tetraspanin 9                                                                                        | NA                         | 0.63                            | 0.77                                        | 0.35                                | 0.01344  | NA                                   | NA                                                   |
| 202096_s_at | 706    | TSPO     | 22  | translocator protein (18kDa)<br>TSR1, 20S rRNA accumulation, homolog (S.<br>cerevisiae)              | Yes                        | 1.00                            | 0.98                                        | 0.88                                | 0.038733 | Yes                                  | Yes                                                  |
| 218156_s_at | 55720  | TSR1     | 17  | cerevisiae)                                                                                          | NA                         | 1.00                            | 1.00                                        | 0.88                                | 0.037847 | NA                                   | NA                                                   |
| 201644_at   | 7264   | TSTA3    | 8   | tissue specific transplantation antigen P35B                                                         | Yes                        | 0.95                            | 0.81                                        | 0.55                                | 0.004579 | Yes                                  | Yes                                                  |
| 215598_at   | 54970  | TTC12    | 11  | tetratricopeptide repeat domain 12                                                                   | Yes                        | 0.47                            | 0.32                                        | 0.10                                | 0.006717 | Yes                                  | Yes                                                  |
| 218272_at   | 55020  | TTC38    | 22  | tetratricopeptide repeat domain 38                                                                   | NA                         | 0.68                            | 0.44                                        | 0.20                                | 0.004314 | NA                                   | NA                                                   |
| 219633_at   | 79183  | TTPAL    | 20  | tocopherol (alpha) transfer protein-like                                                             | NA                         | 0.95                            | 0.74                                        | 0.55                                | 0.005494 | NA                                   | NA                                                   |
| 205807_s_at | 7286   | TUFT1    | 1   | tuftelin 1                                                                                           | Yes                        | 1.00                            | 1.00                                        | 0.85                                | 0.008352 | Yes                                  | Yes                                                  |
| 211177_s_at | 10587  | TXNRD2   | 22  | thioredoxin reductase 2                                                                              | Yes                        | 0.89                            | 0.35                                        | 0.43                                | 0.022414 | No                                   | No                                                   |
| 65521_at    | 51619  | UBE2D4   | 7   | ubiquitin-conjugating enzyme E2D 4 (putative)                                                        | Yes                        | 0.95                            | 0.32                                        | 0.48                                | 0.027001 | Yes                                  | Yes                                                  |
| 210685_s_at | 10277  | UBE4B    | 1   | ubiquitination factor E4B (UFD2 homolog,<br>yeast)                                                   | Yes                        | 0.79                            | 0.12                                        | 0.13                                | 0.000456 | Yes                                  | Yes                                                  |
| 219131_at   | 29914  | UBIAD1   | 1   | UbiA prenyltransferase domain containing 1                                                           | Yes                        | 0.53                            | 0.23                                        | 0.10                                | 0.009473 | Yes                                  | Yes                                                  |
| 218533_s_at | 54963  | UCKL1    | 20  | uridine-cytidine kinase 1-like 1                                                                     | Yes                        | 1.00                            | 0.93                                        | 0.80                                | 0.017771 | Yes                                  | Yes                                                  |
| 202365_at   | 84747  | UNC119B  | 12  | unc-119 homolog B (C. elegans)<br>UPF1 regulator of nonsense transcripts                             | NA                         | 1.00                            | 0.77                                        | 0.63                                | 0.005914 | NA                                   | NA                                                   |
| 211168_s_at | 5976   | UPF1     | 19  | homolog (yeast)<br>upstream transcription factor 2, c-fos                                            | Yes                        | 0.84                            | 0.47                                        | 0.40                                | 0.006686 | Yes                                  | Yes                                                  |
| 202152_x_at | 7392   | USF2     | 19  | interacting                                                                                          | Yes                        | 0.16                            | 0.02                                        | 0.00                                | 0.02755  | Yes                                  | Yes                                                  |
| 216775_at   | 54532  | USP53    | 4   | ubiquitin specific peptidase 53                                                                      | Yes                        | 0.74                            | 0.61                                        | 0.20                                | 0.000114 | No                                   | No                                                   |
| 205019_s_at | 7433   | VIPR1    | 3   | vasoactive intestinal peptide receptor 1<br>vacuolar protein sorting 13 homolog D (S.<br>cerevisiae) | Yes                        | 0.32                            | 0.42                                        | 0.03                                | 0.005931 | Yes                                  | Yes                                                  |
| 212326_at   | 55187  | VPS13D   | 1   | cerevisiae)<br>vacuolar protein sorting 8 homolog (S.<br>cerevisiae)                                 | NA                         | 0.84                            | 0.33                                        | 0.35                                | 0.014164 | NA                                   | NA                                                   |
| 209553_at   | 23355  | VPS8     | 3   | cerevisiae)<br>Williams-Beuren syndrome chromosome                                                   | Yes                        | 0.95                            | 0.61                                        | 0.63                                | 0.048948 | Yes                                  | Yes                                                  |
| 221247_s_at | 81554  | WBSCR16  | 7   | region 16                                                                                            | Yes                        | 1.00                            | 0.82                                        | 0.68                                | 0.013122 | Yes                                  | Yes                                                  |
| 222138_s_at | 64743  | WDR13    | X   | WD repeat domain 13                                                                                  | Yes                        | 0.89                            | 1.00                                        | 0.75                                | 0.020028 | Yes                                  | Yes                                                  |

Supplemental Table I

| ProbeSet    | Entrez | Symbol  | Chr | Gene name                                                                     | Gene in<br>NCBI<br>dataset | Proportion                      |                                             |                                     | q-value  | CpG<br>islands<br>(Takai &<br>Jones) | CpG<br>islands<br>(Gardiner-<br>Garden &<br>Frommer) |
|-------------|--------|---------|-----|-------------------------------------------------------------------------------|----------------------------|---------------------------------|---------------------------------------------|-------------------------------------|----------|--------------------------------------|------------------------------------------------------|
|             |        |         |     |                                                                               |                            | Proportion<br>Present<br>Normal | Proportion<br>Present<br>Pre-<br>neoplastic | Proportion<br>Present<br>Neoplastic |          |                                      |                                                      |
| 220917_s_at | 57728  | WDR19   | 4   | WD repeat domain 19                                                           | Yes                        | 0.79                            | 0.56                                        | 0.38                                | 0.015698 | Yes                                  | Yes                                                  |
| 201886_at   | 80344  | WDR23   | 14  | WD repeat domain 23                                                           | NA                         | 1.00                            | 1.00                                        | 0.90                                | 0.034017 | NA                                   | NA                                                   |
| 212880_at   | 23335  | WDR7    | 18  | WD repeat domain 7                                                            | Yes                        | 0.89                            | 0.91                                        | 0.55                                | 0.001654 | Yes                                  | Yes                                                  |
| 221712_s_at | 54663  | WDR74   | 11  | WD repeat domain 74                                                           | Yes                        | 0.95                            | 0.82                                        | 0.65                                | 0.025877 | Yes                                  | Yes                                                  |
| 219322_s_at | 49856  | WDR8    | 1   | WD repeat domain 8                                                            | Yes                        | 0.84                            | 0.61                                        | 0.50                                | 0.028017 | Yes                                  | Yes                                                  |
| 206459_s_at | 7482   | WNT2B   | 1   | wingless-type MMTV integration site family,<br>member 2B                      | Yes                        | 0.37                            | 0.05                                        | 0.05                                | 0.014718 | Yes                                  | Yes                                                  |
| 214759_at   | 9589   | WTAP    | 6   | Wilms tumor 1 associated protein                                              | Yes                        | 0.37                            | 0.12                                        | 0.10                                | 0.038221 | Yes                                  | Yes                                                  |
| 210695_s_at | 51741  | WWOX    | 16  | WW domain containing oxidoreductase                                           | Yes                        | 0.95                            | 0.47                                        | 0.50                                | 0.033971 | Yes                                  | Yes                                                  |
| 206536_s_at | 331    | XIAP    | X   | X-linked inhibitor of apoptosis<br>X-prolyl aminopeptidase (aminopeptidase P) | NA                         | 0.95                            | 0.32                                        | 0.28                                | 0.001169 | NA                                   | NA                                                   |
| 220020_at   | 63929  | XPNPEP3 | 22  | 3, putative                                                                   | NA                         | 0.42                            | 0.25                                        | 0.03                                | 0.001532 | NA                                   | NA                                                   |
| 211982_x_at | 23214  | XPO6    | 16  | exportin 6                                                                    | Yes                        | 0.95                            | 0.79                                        | 0.53                                | 0.001822 | No                                   | No                                                   |
| 206063_x_at | 29799  | YPEL1   | 22  | yippee-like 1 (Drosophila)                                                    | NA                         | 0.26                            | 0.11                                        | 0.03                                | 0.017556 | NA                                   | NA                                                   |
| 205883_at   | 7704   | ZBTB16  | 11  | zinc finger and BTB domain containing 16                                      | Yes                        | 0.89                            | 1.00                                        | 0.75                                | 0.020028 | Yes                                  | Yes                                                  |
| 203602_s_at | 7709   | ZBTB17  | 1   | zinc finger and BTB domain containing 17                                      | Yes                        | 0.95                            | 0.68                                        | 0.60                                | 0.038679 | Yes                                  | Yes                                                  |
| 205877_s_at | 23264  | ZC3H7B  | 22  | zinc finger CCCH-type containing 7B                                           | Yes                        | 0.32                            | 0.04                                        | 0.05                                | 0.015629 | Yes                                  | Yes                                                  |
| 213323_s_at | 23264  | ZC3H7B  | 22  | zinc finger CCCH-type containing 7B                                           | Yes                        | 0.37                            | 0.02                                        | 0.03                                | 0.002462 | Yes                                  | Yes                                                  |
| 222186_at   | 54469  | ZFAND6  | 15  | zinc finger, AN1-type domain 6                                                | Yes                        | 0.63                            | 0.88                                        | 0.43                                | 0.026448 | Yes                                  | Yes                                                  |
| 219779_at   | 79776  | ZFHX4   | 8   | zinc finger homeobox 4                                                        | Yes                        | 0.68                            | 0.58                                        | 0.43                                | 0.048917 | No                                   | Yes                                                  |
| 201367_s_at | 678    | ZFP36L2 | 2   | zinc finger protein 36, C3H type-like 2                                       | Yes                        | 0.74                            | 0.67                                        | 0.48                                | 0.046348 | Yes                                  | Yes                                                  |
| 219778_at   | 23414  | ZFPM2   | 8   | zinc finger protein, multitype 2                                              | Yes                        | 0.79                            | 1.00                                        | 0.58                                | 0.006628 | Yes                                  | Yes                                                  |
| 210282_at   | 7750   | ZMYM2   | 13  | zinc finger, MYM-type 2                                                       | Yes                        | 0.95                            | 0.75                                        | 0.53                                | 0.002577 | Yes                                  | Yes                                                  |
| 206314_at   | 55888  | ZNF167  | 3   | zinc finger protein 167                                                       | Yes                        | 0.53                            | 0.35                                        | 0.10                                | 0.002166 | Yes                                  | Yes                                                  |
| 216983_s_at | 7767   | ZNF224  | 19  | zinc finger protein 224                                                       | Yes                        | 0.53                            | 0.54                                        | 0.15                                | 0.011621 | Yes                                  | Yes                                                  |
| 206261_at   | 8187   | ZNF239  | 10  | zinc finger protein 239                                                       | Yes                        | 0.58                            | 0.53                                        | 0.30                                | 0.04063  | No                                   | No                                                   |
| 217627_at   | 126231 | ZNF573  | 19  | zinc finger protein 573                                                       | Yes                        | 0.89                            | 0.93                                        | 0.65                                | 0.030734 | Yes                                  | Yes                                                  |
| 204175_at   | 51042  | ZNF593  | 1   | zinc finger protein 593                                                       | NA                         | 1.00                            | 0.88                                        | 0.70                                | 0.019051 | NA                                   | NA                                                   |
| 205594_at   | 22834  | ZNF652  | 17  | zinc finger protein 652                                                       | Yes                        | 1.00                            | 0.95                                        | 0.83                                | 0.032847 | Yes                                  | Yes                                                  |
| 214813_at   | 7626   | ZNF75D  | X   | zinc finger protein 75D                                                       | NA                         | 0.89                            | 0.32                                        | 0.40                                | 0.039693 | NA                                   | NA                                                   |
| 57516_at    | 92595  | ZNF764  | 16  | zinc finger protein 764                                                       | NA                         | 1.00                            | 0.81                                        | 0.55                                | 0.001171 | NA                                   | NA                                                   |
| 220608_s_at | 54989  | ZNF770  | 15  | zinc finger protein 770                                                       | NA                         | 0.32                            | 0.26                                        | 0.08                                | 0.034165 | NA                                   | NA                                                   |
| 219086_at   | 55778  | ZNF839  | 14  | zinc finger protein 839                                                       | NA                         | 0.95                            | 0.74                                        | 0.60                                | 0.011936 | NA                                   | NA                                                   |
| 215263_at   | 7789   | ZXDA    | X   | zinc finger, X-linked, duplicated A                                           | Yes                        | 0.63                            | 0.14                                        | 0.15                                | 0.007528 | Yes                                  | Yes                                                  |
| 212601_at   | 23140  | ZZEF1   | 17  | zinc finger, ZZ-type with EF-hand domain 1                                    | Yes                        | 0.68                            | 0.75                                        | 0.40                                | 0.02018  | Yes                                  | Yes                                                  |
